# Supplementary material for: GASS Trial study protocol: a multicentre, single-blind, randomised clinical trial comparing general anaesthesia and sedation during intra-arterial treatment for stroke
Source: PubMed Central journal article supplement — BMJ Open. 2019 Jun 1;9(5):e024249. doi: 10.1136/bmjopen-2018-024249 (PMC6550003; doi:10.1136/bmjopen-2018-024249), 2019-06-01
Supplement: bmjopen-2018-024249.draft_revisions.pdf [file bmjopen-2018-024249.draft_revisions.pdf]

# BMJ Open

BMJ Open is committed to open peer review. As part of this commitment we make the peer review history of every article we publish publicly available.

When an article is published we post the peer reviewers' comments and the authors' responses online. We also post the versions of the paper that were used during peer review. These are the versions that the peer review comments apply to.

The versions of the paper that follow are the versions that were submitted during the peer review process. They are not the versions of record or the final published versions. They should not be cited or distributed as the published version of this manuscript.

BMJ Open is an open access journal and the full, final, typeset and author-corrected version of record of the manuscript is available on our site with no access controls, subscription charges or pay-per-view fees (<http://bmjopen.bmj.com>).

If you have any questions on BMJ Open's open peer review process please email [info.bmjopen@bmj.com](mailto:info.bmjopen@bmj.com)

# BMJ Open

## **GASS Trial study protocol: a multicentre, single-blind, randomised clinical trial comparing general anaesthesia and sedation during intra-arterial treatment for stroke.**

|                               |                                                                                                                                                                                                                                                                                                                                                                                                                                                                                                                                                                                                                                                                                                                                                                                                                                                                                                                         |
|-------------------------------|-------------------------------------------------------------------------------------------------------------------------------------------------------------------------------------------------------------------------------------------------------------------------------------------------------------------------------------------------------------------------------------------------------------------------------------------------------------------------------------------------------------------------------------------------------------------------------------------------------------------------------------------------------------------------------------------------------------------------------------------------------------------------------------------------------------------------------------------------------------------------------------------------------------------------|
| Journal:                      | <i>BMJ Open</i>                                                                                                                                                                                                                                                                                                                                                                                                                                                                                                                                                                                                                                                                                                                                                                                                                                                                                                         |
| Manuscript ID                 | bmjopen-2018-024249                                                                                                                                                                                                                                                                                                                                                                                                                                                                                                                                                                                                                                                                                                                                                                                                                                                                                                     |
| Article Type:                 | Protocol                                                                                                                                                                                                                                                                                                                                                                                                                                                                                                                                                                                                                                                                                                                                                                                                                                                                                                                |
| Date Submitted by the Author: | 18-May-2018                                                                                                                                                                                                                                                                                                                                                                                                                                                                                                                                                                                                                                                                                                                                                                                                                                                                                                             |
| Complete List of Authors:     | <p>Maurice, Axelle; CHU Rennes, Pôle Anesthésie et Réanimation, Inserm, NuMeCan, CIC 1414 and Université de Rennes 1</p> <p>Ferré, Jean-Christophe; CHU Rennes, Department of Neuroradiology</p> <p>Ronzière, Thomas; CHU Rennes, Department of Neurology</p> <p>Devys, Jean-Michel; Service d'Anesthésie-Réanimation, Fondation Ophtalmologique Adolphe de Rothschild 25, rue Manin, F-75019 Paris, France</p> <p>Subileau, Aurelie; Service d'anesthésie réanimation, CHRU La Cavale Blanche, Boulevard T.Prigent, F-29200 Brest, france</p> <p>Laffon, Marc; Service d'anesthésie réanimation 1 , CHU hôpital Bretonneau, 2 boulevard Tonnellé, F-37044 Tours, France</p> <p>Laviolle, Bruno; CHU Rennes, Clinical Pharmacology department and Inserm CIC 1414, Université de Rennes 1</p> <p>beloeil, helene; CHU Rennes, Pôle Anesthésie et Réanimation, Inserm, NuMeCan, CIC 1414 and Université de Rennes 1,</p> |
| Keywords:                     | Stroke < NEUROLOGY, endovascular therapy, Anaesthesia in neurology < ANAESTHETICS                                                                                                                                                                                                                                                                                                                                                                                                                                                                                                                                                                                                                                                                                                                                                                                                                                       |
|                               |                                                                                                                                                                                                                                                                                                                                                                                                                                                                                                                                                                                                                                                                                                                                                                                                                                                                                                                         |

SCHOLARONE™  
Manuscripts

**Title:** GASS Trial study protocol: a multicentre, single-blind, randomised clinical trial comparing general anaesthesia and sedation during intra-arterial treatment for stroke.

**Authors:** Axelle Maurice<sup>1</sup>, Jean-Christophe Ferré<sup>2</sup>, Thomas Ronziere<sup>3</sup>, Jean-Michel Devys<sup>4</sup>, Aurelie Subileau<sup>5</sup>, Marc Laffon<sup>6</sup>, Bruno Laviolle<sup>7</sup>, Helene Beloeil<sup>1</sup>, on behalf of the SFAR research network

#### **Authors' affiliations**

<sup>1</sup> Univ Rennes, CHU Rennes, Inserm, CIC 1414 NuMeCan, Pôle Anesthésie et Réanimation, F-35033 Rennes, France

<sup>2</sup> CHU Rennes, department of Neuroradiology, F-35033 Rennes, France

<sup>3</sup> CHU Rennes, Service de neurologie, F-35033 Rennes, France

<sup>4</sup> Service d'Anesthésie-Réanimation, Fondation Ophtalmologique Adolphe de Rothschild 25, rue Manin, F-75019 Paris, France

<sup>5</sup> Service d'anesthésie réanimation, CHRU La Cavale Blanche, Boulevard T.Prigent, F-29200 Brest, France

<sup>6</sup> Service d'anesthésie réanimation 1, CHU hôpital Bretonneau, 2 boulevard Tonnellé, F-37044 Tours, France

<sup>7</sup> Univ Rennes, CHU Rennes, Inserm, CIC 1414 (Centre d'Investigation Clinique de Rennes), F-35000 Rennes, France

**Address for correspondence:** Helene Beloeil, Pole Anesthésie-Réanimation Medecine Interne Geriatrie, CHU Rennes, 2 avenue Henri Le Guilloux, 35033 Rennes Cedex, France.  
Email: [helene.beloeil@chu-rennes.fr](mailto:helene.beloeil@chu-rennes.fr)

1  
2  
3 29 **ABSTRACT**

4 30 **Introduction:** Treatment of acute stroke has drastically changed in the last 10 years.  
5  
6 31 Endovascular therapy is now the standard of care for patients with a stroke caused by a  
7  
8 32 large vessel occlusion in the anterior circulation. The impact of the type of anaesthesia  
9  
10 33 (general anaesthesia or conscious sedation) during endovascular therapy on the outcome of  
11  
12 34 the patients is still a matter of debate. Previous studies are mostly retrospective and/or  
13  
14 35 focused on the early post-procedure outcome and/or without blood pressure goals and/or  
15  
16 36 single-centre small size studies. We therefore designed a multicentre study hypothesizing  
17  
18 37 that conscious sedation is associated with a better functional outcome 3 months after  
19  
20 38 endovascular therapy for the treatment of stroke compared with general anaesthesia.  
21

22 39  
23  
24 40 **Methods/analysis:** The GASS trial is a randomised, parallel, single-blind, multicentre study  
25  
26 41 of 350 patients undergoing endovascular therapy for the treatment of stroke. Patients will be  
27  
28 42 randomly allocated to receive either a general anaesthesia or a conscious sedation. The  
29  
30 43 primary outcome measure is the modified Rankin score assessed 3 months after the  
31  
32 44 treatment. Data will be analysed on the intention-to-treat principle.  
33

34 45  
35  
36 46 **Ethics/dissemination:** The GASS trial has been approved by an independent ethics  
37  
38 47 committee for all study centres. Participant recruitment begins in September 2016. Results  
39  
40 48 will be published in international peer-reviewed medical journals.  
41

42 49  
43  
44 50 **Trial registration number:** The trial is registered at ClinicalTrials.gov (Identifier: NCT  
45  
46 51 02822144)  
47  
48  
49  
50  
51  
52  
53  
54  
55  
56  
57  
58  
59  
60

1  
2  
3 52 **Strengths and limitations of this study**

- 4  
5 53 • GASS trial is the first randomised, parallel, single-blind, multicentre study comparing the  
6  
7 54 effects of general anaesthesia and conscious sedation during endovascular therapy for  
8  
9 55 stroke and focused on the functional outcome of the patients 3 months after the  
10  
11 56 treatment.
- 12  
13 57 • The multicentre design, broad inclusion criteria, large sample size (350 patients) and  
14  
15 58 follow-up will support external validity.
- 16  
17 59 • Limitations: The study does not include a systemic CT-scan after the endovascular  
18  
19 60 treatment. The sizing of the stroke is also not part of the study as it is newly  
20  
21 61 implemented technology. It was not part of the routine care at the time of the design of  
22  
23 62 the study.
- 24  
25 63

## 64 INTRODUCTION

65 The treatment of acute stroke has been recently transformed with the publication of RCTs  
66 showing the benefit of endovascular therapy when compare with the medical treatment in  
67 terms of functional outcome (1-4). Endovascular therapy in addition to the medical treatment  
68 is now the standard of care for selected patients who had a stroke caused by a large vessel  
69 occlusion in the anterior circulation. All studies have highlighted that the rapidity of the  
70 treatment is an essential factor for a good outcome. The other important factor is the  
71 haemodynamic conditions during the procedure because instability can worsen the clinical  
72 outcome (5,6). A retrospective study concluded that a change of even 10% in mean arterial  
73 pressure almost quadrupled the risk for poor outcomes (7).

74 In this context, the best anaesthetic strategy during the endovascular treatment has not been  
75 yet defined. Indeed, the choice between general anaesthesia (GA) and conscious sedation  
76 (CS) remains unclear. While allowing immobility, cerebral protection and airway control, GA  
77 can delay the endovascular treatment. On the other hand, CS is more rapid, allows  
78 neurological assessment during the procedure but the thrombectomy can be more difficult for  
79 the neuroradiologist because of patients' movements. In terms of haemodynamic stability,  
80 retrospective studies reported results favouring CS (8-10). However, these studies did not  
81 focus on the anaesthetic protocol and the intra-procedure haemodynamic. Anaesthetic  
82 protocols were not standardized. The first randomized controlled trial (RCT) on the subject  
83 was published in 2016 (11). This monocentric study did not find any benefit of CS over GA in  
84 terms of outcome 24 hours and 3 months after the treatment. However, functional outcome  
85 at 3 months was only a secondary outcome and the anaesthesia protocol was not detailed.  
86 Moreover, the design allowed patients in the CS group to receive analgesics and/or  
87 sedatives if necessary, which could then transform a CS into a light GA. Löwhagen et al (12)  
88 did also not show any difference between the two anaesthetic technics using a well-  
89 described anaesthesia protocol. However, the study included only 80 patients and was  
90 monocentric. The most recent study (13) using an identical design with infarct growth as the  
91 primary endpoint reported no differences between CS and GA. Clinical outcome at 90 days,

1  
2  
3 92 tested as a secondary endpoint, was better in the GA group. Finally, a meta-analysis  
4  
5 93 analysing the pooled data of 7 trials (14) reported that worse outcomes at 3 months were  
6  
7 94 associated with GA. However, the choice to treat a patient with or without GA was not  
8  
9 95 randomized in the trials included in this meta-analysis (14).

10  
11 96 So far, no study has assessed the clinical outcome 3 months after the stroke treatment  
12  
13 97 comparing GA and CS using standardized anaesthetic protocols and tight haemodynamic  
14  
15 98 control.

16  
17 99 Therefore, we designed a RCT comparing GA and CS during endovascular treatment for  
18  
19 100 acute stroke. Both GA and CS protocols will be standardized and the control of arterial blood  
20  
21 101 pressure too. We hypothesized that CS will be associated with a better clinical outcome  
22  
23 102 measured with the modified Rankin score (mRS) 3 months after the procedure.

24  
25 103

## 104 **METHODS AND ANALYSIS**

### 105 **Trial design**

106 The GASS study is an investigator initiated, national, multicentre, randomised, simple-blind,  
107 parallel-group clinical trial with concealed allocation of patients scheduled to undergo  
108 endovascular therapy for stroke 1:1 to receive either a general anaesthesia protocol or a  
109 conscious sedation protocol. The trial will be conducted in four university and non-university  
110 centres. It started in September 2016 and will continue for a total of 36 months.

111

### 112 **Participant eligibility and consent**

113 Trial site investigators will identify consecutive eligible patients from the listed criteria. Eligible  
114 patients or a family member when appropriate will receive written and oral information and  
115 will be included after investigators have obtained informed written consent.

116

### 117 Inclusion criteria

- 118 1. Adult (18 years or older) patients admitted to the participating centre
- 119 2. Occlusion of a large vessel in the anterior cerebral circulation
- 120 3. Undergoing endovascular therapy for stroke
- 121 4. Benefiting from the health insurance system
- 122 5. Signed informed consent from the patient or their legally next of kin

### 123 Non-inclusion criteria

- 124 1. Pregnant or breast-feeding women
- 125 2. Patients already intubated and mechanical ventilated before inclusion in the study
- 126 3. Intracerebral haemorrhage associated with the ischemic stroke
- 127 4. Contra-indications to conscious sedation: Glasgow coma scale inferior to 8, agitation  
128 not allowing the patient to stay still during the procedure, deglutition disorders
- 129 5. Contra-indications to succinylcholine: hyperkalaemia, allergy
- 130 6. Body mass index superior to 35kg/m<sup>2</sup>
- 131 7. Contra-indication to general anaesthesia



- 1  
2  
3 132 8. Contra-indication to one of the anaesthetic drugs  
4  
5 133 9. Uncontrolled hypotension,  
6  
7 134 10. Life-threatening comorbidity  
8  
9 135 11. Adults legally protected (under judicial protection, guardianship, or supervision),  
10  
11 136 persons deprived of their liberty  
12  
13 137

### 14 138 **Allocation and blinding**

16 139 Patients will be randomised in two groups (general anaesthesia group and conscious  
17  
18 140 sedation group). Randomisation will be done by investigators as close as possible to the  
19  
20 141 endovascular therapy. Each patient will be given a unique randomisation number (patient  
21  
22 142 code). Randomization will be stratified on the centre, the National Institute of Health Stroke  
23  
24 143 Score (NIHSS  $\leq$  or  $>$  14) and the administration or not of IV thrombolysis. The primary  
25  
26 144 evaluation criterion will be assessed blinded to the randomisation group. During the study  
27  
28 145 period, outcome assessors will be kept blind to the randomisation group. Research nurses  
29  
30 146 evaluating the outcomes 3 months after the treatment will not participate to the anaesthesia  
31  
32 147 and will not be aware of the randomisation group. They will be blind to the treatment. The  
33  
34 148 anaesthesiologist, the nurse anaesthesiologist, the neuroradiologist and the neurologist will  
35  
36 149 not be blinded. They will not participate in the assessment of the patients at any time.  
37  
38 150 At each participating centre, data will be collected and entered into the electronic web-based  
39  
40 151 case report form (eCRF) by trial or clinical trained personal (clinical research associate),  
41  
42 152 blinded to the allocation group, under the supervision of the trial site investigators.  
43

44 153

### 46 154 **Interventions**

48 155 All included patients will be allocated to one of the following two study groups:

- 50 156 • **General anaesthesia group:** patients will receive a standardised anaesthesia  
51  
52 157 protocol with remifentanil  
53  
54 158 • **Conscious sedation group:** patients will receive a standard conscious sedation with  
55  
56 159 remifentanil  
57  
58  
59  
60

1  
2  
3 160

4 161 *Standardized general anaesthesia will include:* Induction: Etomidate (0.25 – 0.4 mg/kg) and  
5  
6 162 succinylcholine (1 mg/kg) and maintenance: TCI propofol (maximum target: 4 microg/ml),  
7  
8 163 TCI remifentanil (0.5-4 ng/ml) and curares as needed.

9  
10 164 *Standardized conscious sedation will include:* TCI remifentanil (maximum target 2 ng/ml),  
11  
12 165 local anaesthesia with lidocaine 10 mg/ml (maximum 10 ml). Oxygen will be administered  
13  
14 166 only if  $SPO_2 \leq 96\%$ . Respiratory rate and capnography will be monitored.

15  
16 167 Conscious sedation can be converted into a general anaesthesia in the following situations:

- 17  
18 168
- 19 169 • Agitation or restlessness not allowing the endovascular therapy
  - 20 170 • Vomiting not allowing the endovascular therapy
  - 21 171 • Glasgow coma scale < 8 and /or deglutition disorders
  - 22 172 • Severe hypoxemia with  $SPO_2 < 96\%$  with oxygen delivered with a high concentration  
23 173 mask (10 l/min maximum)
  - 24 174 • Respiratory depression with respiratory rate > 35 /min and/or clinical signs of  
25 175 respiratory exhaustion

26  
27  
28  
29  
30  
31 176 In both groups:

32  
33 177 intraoperative dose changes will be left to the anaesthesiologist in charge of the patient if  
34  
35 178 necessary, IV norepinephrine will be administered in order to maintain blood pressure (BP)  
36  
37 179 within the recommended range: systolic blood pressure (SBP) between 140 and 185 mmHg;  
38  
39 180 diastolic blood pressure (DBP) < 110 mmHg. A drop of more than 25% of the mean blood  
40  
41 181 pressure (MBP) will also be avoided. Norepinephrine will be administered in a dedicated  
42  
43 182 intravenous line and diluted at 250 microg/ml.

44  
45 183 Decisions about all other aspects of patient care will be performed according to the expertise  
46  
47 184 of the staff at each centre and to routine clinical practice to minimize interference with the  
48  
49 185 trial intervention. Three months after the thrombectomy, patients will consult with a  
50  
51 186 neurologist.

52  
53 187

54  
55 188 **Outcome measures**

1  
2  
3 189 Primary outcome measure

4 190 The primary outcome measure will be the neurological outcome assessed with the modified  
5  
6 191 Rankin score 3 months (15) after the endovascular therapy. Success will be considered as a  
7  
8 192 modified Rankin score  $\leq 2$ . The modified Rankin score (mRS) will be assessed by trained  
9  
10 193 research nurse blinded to the randomisation group.

11  
12 194 An additional exploratory analysis of the primary endpoint will be performed to assess  
13  
14 195 treatments effects according to baseline NIHSS ( $\leq$  or  $>$  14) and the administration or not of IV  
15  
16 196 thrombolysis.  
17

18 197

19  
20 198 Secondary outcomes measures

- 21  
22 199
- 23 • Time between the beginning of the clinical symptoms and the last angiography
  - 24 200 • Time between the arrival of the patient and the beginning of the endovascular therapy
  - 25 (time of puncture)
  - 26 201
  - 27 • Quality of the recanalization after the endovascular treatment evaluated by the
  - 28 202 neuroradiologist (not blinded). A good quality recanalization corresponds to a 2b or 3
  - 29 203 modified treatment in cerebral ischemia scale (TICI) (16)
  - 30 204
  - 31 • NIHSS score at Day 1 (day after the endovascular treatment) and Day 7 (or the day
  - 32 205 the patient leaves the hospital if scheduled before D7) (17)
  - 33 206
  - 34 207 • Complications during the procedure (dissection, rupture of the artery, thrombus in
  - 35 208 another territory)
  - 36 209
  - 37 • Mortality rate 3 months after the endovascular treatment
  - 38 210
  - 39 • Number of hypo- or hypertension events during the procedure and the first 24 hours
  - 40 211 after the procedure (hypotension defined as SBP  $<$  140 mmHg or a drop of the MBP
  - 41 212 of 40% or more, hypertension defined as SBP  $>$  185 mmHg or DBP  $>$  110 mmHg)
  - 42 213
  - 43 • Number of patients who received norepinephrine
  - 44 214
  - 45 • Number of conversion of conscious sedation to general anaesthesia
  - 46 215
- 47  
48  
49  
50  
51  
52  
53  
54  
55  
56  
57  
58  
59  
60

## 216 **Statistical analysis**

217 Statistical analysis will be performed on all randomized and evaluated patients (intention to  
218 treat analysis). It will be performed with SAS software (SAS Institute, Cary, NC, USA) in the  
219 Methodology/Biometrics department of the Inserm 1414 Clinical Investigation Centre of  
220 Rennes. A first overall descriptive analysis and analysis by group will be performed. This  
221 consists of separate estimates, numbers and percentages for qualitative variables, means,  
222 standard error, medians and interquartile intervals for quantitative variables. The normal  
223 feature of the distribution of quantitative variables will be checked. Student's t test or a Mann-  
224 Whitney test if necessary will be used to compare quantitative variables, and a Chi<sup>2</sup> or  
225 Fisher's exact test if necessary will be used to compare qualitative variables between two  
226 groups at inclusion. The primary endpoint will be compared between the two groups with the  
227 Chi<sup>2</sup> test. Two interim analyses after inclusion of 1/3 and 2/3 of the patients, and one final  
228 analysis are planned. Stopping rules will use the alpha spending function with the O'Brien-  
229 Fleming boundary. The cumulative values of alpha for each analysis are: 0.00021 at the first  
230 analysis, 0.01202 at the second analysis and 0.04626 at the final analysis (nTerim, V1.1,  
231 Statistical solutions Ltd, Cork, Ireland). The trial will be stopped early if the significance of the  
232 Chi<sup>2</sup> test is below these alpha values. For the analysis of the other endpoints, the same  
233 strategy as for baseline comparisons will be used. Continuous endpoints repeatedly  
234 measured during the study will be compared using a repeated measure two-way (time, group)  
235 analysis of variance. For all these analyses, adjustments can be made in case of  
236 heterogeneity at inclusion. Except for the interim analyses, a p value <0.05 will be  
237 considered as significant for all analyses.

238

## 239 **Missing values**

240 Missing data will not be replaced. Mixed models can be used in analysis of repeated data to  
241 avoid deleting subjects with any missing values.

242

## 243 **Sample size estimation**

1  
2  
3 244 A previous study reported 30% of the patients with a mRS score  $\leq 2$  after endovascular  
4 245 therapy under general anaesthesia (18). We aim to show an increase of patients with a good  
5 246 prognostic (defined as mRS  $\leq 2$ ) up to 45% after endovascular treatment under conscious  
6 247 sedation. Therefore, 166 patients per group will be needed to have 80% power, at a two-  
7 248 sided alpha level of 0.05. A total of 350 patients will be included to take into account non-  
8 249 evaluable patients and drop outs.  
9  
10  
11  
12  
13  
14  
15

250

### 251 **Data Registration**

16  
17  
18 252 Data will be entered into the web- based electronic case report form (eCRF) by trial or clinical  
19 253 personnel under the supervision of the trial site investigators at each participating centre.  
20 254 From the eCRF the trial database will be established. Data collection will be monitored by  
21 255 trained research coordinators.  
22  
23  
24  
25  
26

256

257 The following data will be registered:

#### 258 Baseline characteristics at randomisation:

259 Demographic data (age, height, weight, gender and body mass index); American Society of  
260 Anaesthesiologists (ASA) physical status; significant comorbidities (cardio-vascular,  
261 respiratory, neurologic , psychiatric and /or abdominal disease, cancer, preoperative  
262 chemotherapy or radiotherapy), NIHSS score, time of arrival at the hospital, time of the  
263 beginning of the symptoms, time of the cerebral angiography or MRI, localisation of the  
264 stroke, IV fibrinolysis if applicable, creatinine clearance, haemostasis (PT and ACT if  
265 available).

#### 266 Intraoperative data:

267 Time of arterial puncture, time of recanalization, TICl score (16), doses of norepinephrine,  
268 intraoperative complications (hypotension defined as SBP < 140 mmHg or a drop of the MBP  
269 of 40% or more, hypertension defined as SBP> 185 mmHg or DBP > 110 mmHg) necessity  
270 to convert the conscious sedation onto a general anaesthesia.  
271

271

1  
2  
3 272 Postoperative data:

4  
5 273 The following data will be collected:

- 6  
7 274 • NIHSS day 1 and Day 7 or the day the patient leaves the hospital if before Day 7  
8  
9 275 • Necessity of noradrenaline during the first 2 hours after the endovascular treatment  
10  
11 276 • Hypo-or hypertension events as defined above during first 24 hours  
12  
13 277 • Death until the final call for mRS (3 months after the procedure)  
14  
15 278 • mRS 3 months after the procedure during a telephone interview (19).  
16

17 279

18  
19 280 **Patient withdrawal**

20  
21 281 A participant who no longer agrees to participate in the clinical trial can withdraw the  
22  
23 282 informed consent at any time without need of further explanation. Participants who will  
24  
25 283 withdraw from the study will be followed up, according to routine clinical practice in each  
26  
27 284 participating centre. In order to conduct intention-to-treat analyses with as little missing data  
28  
29 285 as possible, the investigator may ask the participant which aspects of the trial he/she wishes  
30  
31 286 to withdraw from (participation in the remaining follow-up assessments, use of already  
32  
33 287 collected data). Whenever possible, the participant will be asked for permission to obtain  
34  
35 288 data for the primary outcome measure. All randomised patients will be reported, and all data  
36  
37 289 available with consent will be used in the analyses. If appropriate, missing data will be  
38  
39 290 handled in accordance with multiple imputation procedures if missing data are greater than  
40  
41 291 5%.  
42

43 292

44  
45 293 **Safety**

46  
47 294 Every serious adverse event related to the studied treatment or not, expected or unexpected,  
48  
49 295 will be reported within 24 hours by the investigator to the sponsor on a "Serious adverse  
50  
51 296 event" form on which will be indicated the date of occurrence, criterion of severity, intensity,  
52  
53 297 relationship with the treatment (or the study) evaluated, and the outcome. The period in  
54  
55 298 which serious adverse events should be reported begins from the day of the written informed  
56  
57  
58  
59  
60

1  
2  
3 299 consent to the end of the follow-up (day of the evaluation of mRS 3 to 4 months after the  
4  
5 300 procedure). Whenever a serious adverse event persists at the end of the study, the  
6  
7 301 investigator will follow the patient until the event is considered resolved. The following events:  
8  
9 302 hypo- or hypertension will be recorded as study endpoints criterion in the case report form. In  
10  
11 303 order to avoid collection duplication, they will not be reported on the “adverse event” page of  
12  
13 304 the case report form. As planned in the study, they will be analysed at the time of interim  
14  
15 305 analyses (two interim analyses after inclusion of 1/3 and 2/3 of the patients) which will permit  
16  
17 306 to show potential difference between the two groups during the study.

18  
19 307 In addition, serious adverse events will be submitted to the data monitoring and safety  
20  
21 308 committee (DMSC). The DMSC is independent of the trial investigators and will perform an  
22  
23 309 ongoing review of safety parameters and overall study conduct. The DMSC is comprised of a  
24  
25 310 neurologist, an anaesthesiologist, a neuroradiologist, a pharmacologist and a methodologist.  
26  
27 311 The DMSC will be responsible for safeguarding the interests of trial participants, assessing  
28  
29 312 the safety and efficacy of the interventions during the trial, and for monitoring the overall  
30  
31 313 conduct of the clinical trial. To contribute to enhancing the integrity of the trial, the DMSC  
32  
33 314 may also formulate recommendations relating to the recruitment/retention of participants,  
34  
35 315 their management, improving adherence to protocol-specified regimens and retention of  
36  
37 316 participants, and the procedures for data management and quality control.  
38  
39 317 Recommendations for pausing or stopping the study will be made by the DMSC in case of  
40  
41 318 serious adverse reactions and suspected unexpected serious adverse reaction.

42  
43 319 All adverse events for which the investigator or the sponsor considers that a causal  
44  
45 320 relationship with the investigational medicinal products can be reasonably considered, will be  
46  
47 321 considered as suspected adverse reactions. If they are unexpected, they are qualified as  
48  
49 322 being Suspected Unexpected SAR (SUSAR) and will be notified in a report by the sponsor to  
50  
51 323 Eudravigilance (European pharmacovigilance database) and to local regulatory agency  
52  
53 324 within the regulatory time periods for reporting: Immediate declaration if seriousness criteria  
54  
55 325 is death or life-threatening condition, declaration within 15 days for other seriousness criteria.

56  
57 326

1  
2  
3 327 **Data handling and retention**

4 328 Data will be handled according to French law. All original records (including consent forms,  
5  
6 329 reports of suspected unexpected serious adverse reactions and relevant correspondences)  
7  
8 330 will be archived at trial sites for 15 years. The clean trial database file will be anonymised and  
9  
10 331 maintained for 15 years.

11  
12 332

13  
14 333 **Patient and public involvement**

15  
16 334 Patient and public were not involved in any of the phases of this study

17  
18 335

19  
20 336 **ETHICS AND DISSEMINATION**

21  
22 337

23  
24 338 **Ethical and legislative approvals**

25  
26 339 GASS trial was approved by the French National Safety and Drug Agency (Agence Nationale  
27  
28 340 de Sécurité du Médicament (September 8<sup>th</sup>, 2016). By June 13<sup>th</sup>, 2016, the study has been  
29  
30 341 approved for all centres by a central ethics committee (Comité de Protection des Personnes  
31  
32 342 de Poitiers). The GASS trial is registered in the European Clinical Trials Database (EudraCT  
33  
34 343 2016-000795-25) and at ClinicalTrials.gov with the trial identification number NCT02822144.  
35  
36 344 Trial methods and results will be reported according to the Consolidated Standards of  
37  
38 345 Reporting Trials (CONSORT) 2010 guidelines (20).

39  
40 346

41  
42 347 **Publication plan**

43  
44 348 Scientific presentations and reports corresponding to the study will be written under the  
45  
46 349 responsibility of the coordinating investigator of the study with the agreement of the principal  
47  
48 350 investigators and the methodologist. The co-authors of the report and of publications will be  
49  
50 351 the investigators and clinicians involved, on a pro rata basis of their contribution in the study,  
51  
52 352 as well as the biostatistician and associated researchers. All trial sites will be acknowledged,  
53  
54 353 and all investigators at these sites will appear with their names under 'the GASS



1  
2  
3 354 investigators' in an Appendix to the final manuscript. Rules on publication will follow  
4  
5 355 international recommendations (21).

6  
7 356

8  
9 357 **Conclusion**

10 358 The GASS trial is the first randomised, parallel, single-blind, multicentre study evaluating the  
11  
12 359 effect the type of anaesthesia on the functional outcome 3 months after endovascular  
13  
14 360 therapy for stroke. The results of GASS will give strong data to help choosing the best type of  
15  
16 361 sedation during endovascular therapy for stroke.  
17

18  
19 362

20 363 **Contributors:** Axelle Maurice (AM) contributed to the conception and design of the research  
21  
22 364 protocol and wrote the research protocol. Helene Beloeil (HB) provided critical input  
23  
24 365 pertaining to the design of the trial interventions and procedures. AM wrote the first draft of  
25  
26 366 the protocol and HB this manuscript. Bruno Laviolle (BL) designed the study and its statistical  
27  
28 367 analysis plan. All authors (AM, JCF, TR, JMD, AS, BL, HB) critically revised and modified the  
29  
30 368 protocol and the article. They all approved the final version to be published.  
31

32  
33 369

34 370 **Funding:** GASS trial is supported by funding from French Ministry of Health (Programme  
35  
36 371 Hospitalier de Recherché Clinique Inter regional (PHRCI 2015).

37  
38 372 The funding sources had no role in the trial design, trial conduct, data handling, data analysis  
39  
40 373 or writing and publication of the manuscript.  
41

42  
43 374

44 375 **Sponsor:** CHU de Rennes, Direction de la recherché Clinique, 2 avenue Henri Le Guilloux,  
45  
46 376 35033 Rennes Cedex, France. The sponsor had no role in the trial design, trial conduct, data  
47  
48 377 handling, data analysis or writing and publication of the manuscript.  
49

50  
51 378

52  
53 379

54 380 **Competing interests:** None

55  
56 381  
57  
58  
59  
60

382 **References**

- 383 1- Berkhemer OA, Fransen PS, Beumer D, van den Berg LA, Lingsma HF, et al. MR  
384 CLEAN Investigators. A randomized trial of intra-arterial treatment for acute  
385 ischemic stroke. *N Engl J Med*. 2015; 372:11-20.
- 386 2- Goyal M, Demchuk AM, Menon BK, Eesa M, Rempel JL, et al. ESCAPE Trial  
387 Investigators. Randomized Assessment of Rapid Endovascular Treatment of  
388 Ischemic Stroke. *N Engl J Med*. 2015; 372:1019-30.
- 389 3- Campbell BC, Mitchell PJ, Kleinig TJ, Dewey HM, Churilov L, and al. EXTEND-IA  
390 Investigators. Endovascular therapy for ischemic stroke with perfusion-imaging  
391 selection. *N Engl J Med*. 2015; 372:1009-18.
- 392 4- Nogueira RG, Smith WS, Sung G, et al. Effect of time to reperfusion on clinical  
393 outcome of anterior circulation strokes treated with thrombectomy: pooled  
394 analysis of the MERCI and Multi MERCI trials. *Stroke*. 2011; 42: 3144–9.
- 395 5- Davis MJ, Menon BK, Baghirzada LB, Campos-Herrera CR, Goyal M, Hill MD,  
396 Archer DP; Calgary Stroke Program. Aesthetic management and outcome in  
397 patients during endovascular therapy for acute stroke. *Anesthesiology*.  
398 2012;116:396-405.
- 399 6- Löwhagen Hendén P, Rentzos A, Karlsson JE, Rosengren L, Sundeman H,  
400 Reinsfelt B, Ricksten SE. Hypotension During Endovascular Treatment of  
401 Ischemic Stroke Is a Risk Factor for Poor Neurological Outcome. *Stroke*. 2015;  
402 46:2678-2680.
- 403 7- Whalin MK, Halenda KM, Haussen DC, Rebello LC, Frankel MR, Gershon RY,  
404 Nogueira RG. Even Small Decreases in Blood Pressure during Conscious  
405 Sedation Affect Clinical Outcome after Stroke Thrombectomy: An Analysis of  
406 Hemodynamic Thresholds. *AJNR Am J Neuroradiol*. 2017;38:294-298.
- 407 8- Berkhemer OA, van den Berg LA, Fransen PS, Beumer D, Yoo AJ, Lingsma HF,  
408 Schonewille WJ, van den Berg R, Wermer MJ, Boiten J, Lycklama À Nijeholt GJ,  
409 Nederkoorn PJ, Hollmann MW, van Zwam WH, van der Lugt A, van  
410 Oostenbrugge RJ, Majoie CB, Dippel DW, Roos YB; MR CLEAN investigators.  
411 The effect of anaesthetic management during intra-arterial therapy for acute  
412 stroke in MR CLEAN. *Neurology*. 2016 ;87:656-64.
- 413 9- Abou-Chebl A, Yeatts SD, Yan B, Cockroft K, Goyal M, Jovin T, Khatri P, Meyers  
414 P, Spilker J, Sugg R, Wartenberg KE, Tomsick T, Broderick J, Hill MD. Impact of  
415 General Anesthesia on Safety and Outcomes in the Endovascular Arm of  
416 interventional Management of Stroke (IMS) III Trial. *Stroke*. 2015;46:2142-8.

1  
2  
3  
4  
5  
6  
7  
8  
9  
10  
11  
12  
13  
14  
15  
16  
17  
18  
19  
20  
21  
22  
23  
24  
25  
26  
27  
28  
29  
30  
31  
32  
33  
34  
35  
36  
37  
38  
39  
40  
41  
42  
43  
44  
45  
46  
47  
48  
49  
50  
51  
52  
53  
54  
55  
56  
57  
58  
59  
60

- 417 10- Bekelis K, Missios S, MacKenzie TA, Tjoumakaris S, Jabbour P. Anesthesia  
418 Technique and Outcomes of Mechanical Thrombectomy in Patients with Acute  
419 Ischemic Stroke. *Stroke* 2017 ;48:361-366.
- 420 11- Schönenberger S, Uhlmann L, Hacke W, Schieber S, Mundiyanapurath S,  
421 Purruicker JC, Nagel S, Klose C, Pfaff J, Bendszus M, Ringleb PA, Kieser M,  
422 Möhlenbruch MA, Bösel J. Effect of Conscious Sedation vs General Anesthesia  
423 on Early Neurological Improvement Among Patients with Ischemic Stroke  
424 Undergoing Endovascular Thrombectomy: A Randomized Clinical Trial. *JAMA*.  
425 2016;316 :1986-1996.
- 426 12- Löwhagen Henden P, Rentzos A, Karlsson JE, Rosengren L, Leiram B, et al.  
427 General anaesthesia versus conscious sedation for endovascular treatment of  
428 acute ischaemic stroke : the anstroke trial (anaesthesia during stroke). *Stroke*  
429 2017 ; 48 : 1601-1607.
- 430 13- Simonsen CZ, Yoo AJ, Sørensen LH, Juul N, Johnsen SP, Andersen G,  
431 Rasmussen M. Effect of General Anesthesia and Conscious Sedation During  
432 Endovascular Therapy on Infarct Growth and Clinical Outcomes in Acute Ischemic  
433 Stroke: A Randomized Clinical Trial *JAMA Neurol*. 2018 ;75(470-477).
- 434 14- Campbell BCV, van Zwam WH, Menon BK, Dippel DWJ, Demchuk AM, Bracad S  
435 et al. Effect of general anaesthesia on functional outcome in patients with anterior  
436 circulation ischaemic stroke having endovascular thrombectomy versus standard  
437 of care: a meta-analysis of individual patient data. *Lancet neurol* 2018; 17:47-53.
- 438 15- Banks JL, Marotta CA. Outcomes Validity and Reliability of the Modified Rankin  
439 Scale: Implications for Stroke Clinical Trials. A Literature Review and Synthesis.  
440 *Stroke*. 2007; 38:1091-1096.
- 441 16- Zaidat OO, Yoo AJ, Khatri P, Tomsick TA, von Kummer R, Saver JL, et al.  
442 Cerebral Angiographic Revascularization Grading (CARG) Collaborators; STIR  
443 Revascularization working group; STIR Thrombolysis in Cerebral Infarction (TICI)  
444 Task Force. Recommendations on angiographic revascularization grading  
445 standards for acute ischemic stroke: a consensus statement. *Stroke*.  
446 2013 ;44:2650-2663.
- 447 17- Brott T, Adams HP, Olinger CP, Marler JR, Barsan WG, Biller J, SpilkerJ, Holleran  
448 R, Eberle R, Hertzberg V, Rorick M, Moomaw CJ, Walker M. Measurements of  
449 acute cerebral infarction: a clinical examination scale. *Stroke*. 1989; 20:864–870.
- 450 18- Abou-Chebl A, Lin R, Hussain MS, Jovin TG, Levy EI, Liebeskind DS, et al.  
451 Conscious sedation versus general anaesthesia during endovascular therapy for

- 1  
2  
3 452 acute anterior circulation stroke: preliminary results from a retrospective,  
4 453 multicentre study. *Stroke*. 2010; 41:1175-79.  
5  
6 454 19- Bruno A, Akinwuntan AE, Lin C, Close B, Davis K, Baute V et al. Simplified  
7 455 modified rankin scale questionnaire. Reproducibility over the telephone and  
8 validation with quality of life. *Stroke* 2011; 42:2276-9.  
9 456  
10 457 20- Schulz KF, Altman DG, Moher D, et al. CONSORT 2010 statement: updated  
11 guidelines for reporting parallel group randomised trials. *BMJ* 2010;340:c332.  
12 458  
13 459 21- International Committee of Medical Journal E. Uniform requirements for  
14 manuscripts submitted to biomedical journals. *The New England journal of*  
15 460 *medicine* 1997;336(4):309-15  
16 461  
17  
18 462

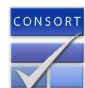

## CONSORT 2010 checklist of information to include when reporting a randomised trial\*

| Section/Topic                    | Item No | Checklist item                                                                                                                                                                              | Reported on page No |
|----------------------------------|---------|---------------------------------------------------------------------------------------------------------------------------------------------------------------------------------------------|---------------------|
| <b>Title and abstract</b>        |         |                                                                                                                                                                                             |                     |
|                                  | 1a      | Identification as a randomised trial in the title                                                                                                                                           | Page 1              |
|                                  | 1b      | Structured summary of trial design, methods, results, and conclusions (for specific guidance see CONSORT for abstracts)                                                                     | Page 2              |
| <b>Introduction</b>              |         |                                                                                                                                                                                             |                     |
| Background and objectives        | 2a      | Scientific background and explanation of rationale                                                                                                                                          | Pages 4&5           |
|                                  | 2b      | Specific objectives or hypotheses                                                                                                                                                           | Page 5              |
| <b>Methods</b>                   |         |                                                                                                                                                                                             |                     |
| Trial design                     | 3a      | Description of trial design (such as parallel, factorial) including allocation ratio                                                                                                        | Page 6              |
|                                  | 3b      | Important changes to methods after trial commencement (such as eligibility criteria), with reasons                                                                                          | NA                  |
| Participants                     | 4a      | Eligibility criteria for participants                                                                                                                                                       | Page 6              |
|                                  | 4b      | Settings and locations where the data were collected                                                                                                                                        | Page 6              |
| Interventions                    | 5       | The interventions for each group with sufficient details to allow replication, including how and when they were actually administered                                                       | Pages 7&8           |
| Outcomes                         | 6a      | Completely defined pre-specified primary and secondary outcome measures, including how and when they were assessed                                                                          | Page 9              |
|                                  | 6b      | Any changes to trial outcomes after the trial commenced, with reasons                                                                                                                       | NA                  |
| Sample size                      | 7a      | How sample size was determined                                                                                                                                                              | Page 11             |
|                                  | 7b      | When applicable, explanation of any interim analyses and stopping guidelines                                                                                                                | Page 10             |
| <b>Randomisation:</b>            |         |                                                                                                                                                                                             |                     |
| Sequence generation              | 8a      | Method used to generate the random allocation sequence                                                                                                                                      | Page 7              |
|                                  | 8b      | Type of randomisation; details of any restriction (such as blocking and block size)                                                                                                         | Page 7              |
| Allocation concealment mechanism | 9       | Mechanism used to implement the random allocation sequence (such as sequentially numbered containers), describing any steps taken to conceal the sequence until interventions were assigned | Page 7              |
| Implementation                   | 10      | Who generated the random allocation sequence, who enrolled participants, and who assigned participants to interventions                                                                     | Page 7              |
| Blinding                         | 11a     | If done, who was blinded after assignment to interventions (for example, participants, care providers, those                                                                                | Page 7              |

|                                                      |     |                                                                                                                                                   |         |
|------------------------------------------------------|-----|---------------------------------------------------------------------------------------------------------------------------------------------------|---------|
|                                                      |     | assessing outcomes) and how                                                                                                                       |         |
|                                                      | 11b | If relevant, description of the similarity of interventions                                                                                       | NA      |
| Statistical methods                                  | 12a | Statistical methods used to compare groups for primary and secondary outcomes                                                                     | Page 10 |
|                                                      | 12b | Methods for additional analyses, such as subgroup analyses and adjusted analyses                                                                  | Page 10 |
| <b>Results</b>                                       |     |                                                                                                                                                   |         |
| Participant flow (a diagram is strongly recommended) | 13a | For each group, the numbers of participants who were randomly assigned, received intended treatment, and were analysed for the primary outcome    | NA      |
|                                                      | 13b | For each group, losses and exclusions after randomisation, together with reasons                                                                  |         |
| Recruitment                                          | 14a | Dates defining the periods of recruitment and follow-up                                                                                           |         |
|                                                      | 14b | Why the trial ended or was stopped                                                                                                                |         |
| Baseline data                                        | 15  | A table showing baseline demographic and clinical characteristics for each group                                                                  |         |
| Numbers analysed                                     | 16  | For each group, number of participants (denominator) included in each analysis and whether the analysis was by original assigned groups           |         |
| Outcomes and estimation                              | 17a | For each primary and secondary outcome, results for each group, and the estimated effect size and its precision (such as 95% confidence interval) |         |
|                                                      | 17b | For binary outcomes, presentation of both absolute and relative effect sizes is recommended                                                       |         |
| Ancillary analyses                                   | 18  | Results of any other analyses performed, including subgroup analyses and adjusted analyses, distinguishing pre-specified from exploratory         |         |
| Harms                                                | 19  | All important harms or unintended effects in each group (for specific guidance see CONSORT for harms)                                             |         |
| <b>Discussion</b>                                    |     |                                                                                                                                                   |         |
| Limitations                                          | 20  | Trial limitations, addressing sources of potential bias, imprecision, and, if relevant, multiplicity of analyses                                  |         |
| Generalisability                                     | 21  | Generalisability (external validity, applicability) of the trial findings                                                                         |         |
| Interpretation                                       | 22  | Interpretation consistent with results, balancing benefits and harms, and considering other relevant evidence                                     |         |
| <b>Other information</b>                             |     |                                                                                                                                                   |         |
| Registration                                         | 23  | Registration number and name of trial registry                                                                                                    | Page 2  |
| Protocol                                             | 24  | Where the full trial protocol can be accessed, if available                                                                                       | NA      |
| Funding                                              | 25  | Sources of funding and other support (such as supply of drugs), role of funders                                                                   | Page 15 |

\*We strongly recommend reading this statement in conjunction with the CONSORT 2010 Explanation and Elaboration for important clarifications on all the items. If relevant, we also recommend reading CONSORT extensions for cluster randomised trials, non-inferiority and equivalence trials, non-pharmacological treatments, herbal interventions, and pragmatic trials. Additional extensions are forthcoming: for those and for up to date references relevant to this checklist, see [www.consort-statement.org](http://www.consort-statement.org).

# BMJ Open

## GASS Trial study protocol: a multicentre, single-blind, randomised clinical trial comparing general anaesthesia and sedation during intra-arterial treatment for stroke.

|                                 |                                                                                                                                                                                                                                                                                                                                                                                                                                                                                                                                                                                                                                                                                                                                                                                                                                                                                     |
|---------------------------------|-------------------------------------------------------------------------------------------------------------------------------------------------------------------------------------------------------------------------------------------------------------------------------------------------------------------------------------------------------------------------------------------------------------------------------------------------------------------------------------------------------------------------------------------------------------------------------------------------------------------------------------------------------------------------------------------------------------------------------------------------------------------------------------------------------------------------------------------------------------------------------------|
| Journal:                        | <i>BMJ Open</i>                                                                                                                                                                                                                                                                                                                                                                                                                                                                                                                                                                                                                                                                                                                                                                                                                                                                     |
| Manuscript ID                   | bmjopen-2018-024249.R1                                                                                                                                                                                                                                                                                                                                                                                                                                                                                                                                                                                                                                                                                                                                                                                                                                                              |
| Article Type:                   | Protocol                                                                                                                                                                                                                                                                                                                                                                                                                                                                                                                                                                                                                                                                                                                                                                                                                                                                            |
| Date Submitted by the Author:   | 28-Nov-2018                                                                                                                                                                                                                                                                                                                                                                                                                                                                                                                                                                                                                                                                                                                                                                                                                                                                         |
| Complete List of Authors:       | Maurice, Axelle; CHU Rennes, Pôle Anesthésie et Réanimation, Inserm, NuMeCan, CIC 1414 and Université de Rennes 1<br>Ferré, Jean-Christophe; CHU Rennes, Department of Neuroradiology<br>Ronzière, Thomas; CHU Rennes, Department of Neurology<br>Devys, Jean-Michel; Service d'Anesthésie-Réanimation, Fondation Ophtalmologique Adolphe de Rothschild 25, rue Manin, F-75019 Paris, France<br>Subileau, Aurelie; Service d'anesthésie réanimation, CHRU La Cavale Blanche, Boulevard T.Prigent, F-29200 Brest, france<br>Laffon, Marc; Service d'anesthésie réanimation 1 , CHU hôpital Bretonneau, 2 boulevard Tonnellé, F-37044 Tours, France<br>Laviolle, Bruno; CHU Rennes, Clinical Pharmacology department and Inserm CIC 1414, Université de Rennes 1<br>beloel, helene; CHU Rennes, Pôle Anesthésie et Réanimation, Inserm, NuMeCan, CIC 1414 and Université de Rennes 1, |
| <b>Primary Subject Heading</b>: | Anaesthesia                                                                                                                                                                                                                                                                                                                                                                                                                                                                                                                                                                                                                                                                                                                                                                                                                                                                         |
| Secondary Subject Heading:      | Neurology, Radiology and imaging                                                                                                                                                                                                                                                                                                                                                                                                                                                                                                                                                                                                                                                                                                                                                                                                                                                    |
| Keywords:                       | Stroke < NEUROLOGY, endovascular therapy, Anaesthesia in neurology < ANAESTHETICS, Adult anaesthesia < ANAESTHETICS, Neurology < INTERNAL MEDICINE, RADIOLOGY & IMAGING                                                                                                                                                                                                                                                                                                                                                                                                                                                                                                                                                                                                                                                                                                             |
|                                 |                                                                                                                                                                                                                                                                                                                                                                                                                                                                                                                                                                                                                                                                                                                                                                                                                                                                                     |

SCHOLARONE™  
Manuscripts

1  
2  
3 1 **Title:** GASS Trial study protocol: a multicentre, single-blind, randomised clinical trial comparing  
4  
5 2 general anaesthesia and sedation during intra-arterial treatment for stroke.  
6  
7 3

8  
9 4 **Authors:** Axelle Maurice<sup>1</sup>, Jean-Christophe Ferré<sup>2</sup>, Thomas Ronziere<sup>3</sup>, Jean-Michel Devys  
10  
11 5 <sup>4</sup>, Aurelie Subileau<sup>5</sup>, Marc Laffon<sup>6</sup>, Bruno Laviolle<sup>7</sup>, Helene Beloeil<sup>1</sup>, on behalf of the SFAR  
12  
13 6 research network  
14  
15 7

16  
17  
18 8 **Authors' affiliations**

19  
20 9 <sup>1</sup> Univ Rennes, CHU Rennes, Inserm, CIC 1414 NuMeCan, Pôle Anesthésie et Réanimation,  
21  
22 10 F-35033 Rennes, France

23  
24 11 <sup>2</sup> CHU Rennes, department of Neuroradiology, F-35033 Rennes, France

25  
26 12 <sup>3</sup> CHU Rennes, Service de neurologie, F-35033 Rennes, France

27  
28 13 <sup>4</sup> Service d'Anesthésie-Réanimation, Fondation Ophtalmologique Adolphe de Rothschild  
29  
30 14 25, rue Manin, F-75019 Paris, France

31  
32 15 <sup>5</sup> Service d'anesthésie réanimation, CHRU La Cavale Blanche, Boulevard T.Prigent, F-29200  
33  
34 16 Brest, france

35  
36 17 <sup>6</sup> Service d'anesthésie réanimation 1 , CHU hôpital Bretonneau, 2 boulevard Tonnellé, F-  
37  
38 18 37044 Tours, France

39  
40 19 <sup>7</sup> Univ Rennes, CHU Rennes, Inserm, CIC 1414 (Centre d'Investigation Clinique de Rennes),  
41  
42 20 F-35000 Rennes, France  
43  
44 21

45  
46 22  
47  
48 23 **Address for correspondence:** Helene Beloeil, Pole Anesthésie-Réanimation Medecine  
49  
50 24 Interne Geriatrie, CHU Rennes, 2 avenue Henri Le Guilloux, 35033 Rennes Cedex, France.

51  
52 25 Email: [helene.beloeil@chu-rennes.fr](mailto:helene.beloeil@chu-rennes.fr)  
53  
54 26  
55  
56 27  
57  
58 28  
59  
60



1  
2  
3 **29 ABSTRACT**  
4

5 **30 Introduction:** Treatment of acute stroke has drastically changed in the last 10 years.  
6  
7 **31** Endovascular therapy is now the standard of care for patients with a stroke caused by a large  
8  
9 **32** vessel occlusion in the anterior circulation. The impact of the type of anaesthesia (general  
10  
11 **33** anaesthesia or conscious sedation) during endovascular therapy on the outcome of the  
12  
13 **34** patients is still a matter of debate. Previous studies are mostly retrospective and/or focused on  
14  
15 **35** the early post-procedure outcome and/or without blood pressure goals and/or single-centre  
16  
17 **36** small size studies. We therefore designed a multicentre study hypothesizing that conscious  
18  
19 **37** sedation is associated with a better functional outcome 3 months after endovascular therapy  
20  
21 **38** for the treatment of stroke compared with general anaesthesia.  
22  
23

24  
25  
26 **40 Methods/analysis:** The GASS trial is a randomised, parallel, single-blind, multicentre study of  
27  
28 **41** 350 patients undergoing endovascular therapy for the treatment of stroke. Patients will be  
29  
30 **42** randomly allocated to receive either a general anaesthesia or a conscious sedation. The  
31  
32 **43** primary outcome measure is the modified Rankin score assessed 3 months after the treatment.  
33  
34 **44** Data will be analysed on the intention-to-treat principle.  
35  
36

37 **45**  
38  
39 **46 Ethics/dissemination:** The GASS trial has been approved by an independent ethics  
40  
41 **47** committee for all study centres. Participant recruitment begins in September 2016. Results will  
42  
43 **48** be published in international peer-reviewed medical journals.  
44  
45

46  
47 **50 Trial registration number:** The trial is registered at ClinicalTrials.gov (Identifier: NCT  
48  
49 **51** 02822144)  
50  
51  
52  
53  
54  
55  
56  
57  
58  
59  
60

1  
2  
3 52 **Strengths and limitations of this study**  
4

- 5 53 • GASS trial is the first randomised, parallel, single-blind, multicentre study comparing the  
6 effects of general anaesthesia and conscious sedation during endovascular therapy for  
7 54 stroke and focused on the functional outcome of the patients 3 months after the treatment.  
8  
9 55  
10  
11 56 • The multicentre design, broad inclusion criteria, large sample size (350 patients) and  
12 follow-up will support external validity.  
13  
14 57  
15  
16 58 • Limitations: The study does not include a systemic CT-scan after the endovascular  
17 treatment. The sizing of the stroke is also not part of the study as it is newly implemented  
18 59 technology. It was not part of the routine care at the time of the design of the study.  
19  
20 60  
21  
22  
23  
24  
25  
26  
27  
28  
29  
30  
31  
32  
33  
34  
35  
36  
37  
38  
39  
40  
41  
42  
43  
44  
45  
46  
47  
48  
49  
50  
51  
52  
53  
54  
55  
56  
57  
58  
59  
60

## 62 INTRODUCTION

63 The treatment of acute stroke has been recently transformed with the publication of RCTs  
64 showing the benefit of endovascular therapy when compare with the medical treatment in  
65 terms of functional outcome (1-4). Endovascular therapy in addition to the medical treatment  
66 is now the standard of care for selected patients who had a stroke caused by a large vessel  
67 occlusion in the anterior circulation. All studies have highlighted that the rapidity of the  
68 treatment is an essential factor for a good outcome. The other important factor is the  
69 haemodynamic conditions during the procedure because instability can worsen the clinical  
70 outcome (5,6). A retrospective study concluded that a change of even 10% in mean arterial  
71 pressure almost quadrupled the risk for poor outcomes (7).

72 In this context, the best anaesthetic strategy during the endovascular treatment has not been  
73 yet defined. Indeed, the choice between general anaesthesia (GA) and conscious sedation  
74 (CS) remains unclear. While allowing immobility, cerebral protection and airway control, GA  
75 can delay the endovascular treatment. On the other hand, CS is more rapid, allows  
76 neurological assessment during the procedure but the thrombectomy can be more difficult for  
77 the neuroradiologist because of patients' movements. In terms of haemodynamic stability,  
78 retrospective studies reported results favouring CS (8-10). However, these studies did not  
79 focus on the anaesthetic protocol and the intra-procedure haemodynamic. Anaesthetic  
80 protocols were not standardized. The first randomized controlled trial (RCT) on the subject was  
81 published in 2016 (11). This monocentric study did not find any benefit of CS over GA in terms  
82 of outcome 24 hours and 3 months after the treatment. However, functional outcome at 3  
83 months was only a secondary outcome and the anaesthesia protocol was not detailed.  
84 Moreover, the design allowed patients in the CS group to receive analgesics and/or sedatives  
85 if necessary, which could then transform a CS into a light GA. Löwhagen et al (12) did also not  
86 show any difference between the two anaesthetic technics using a well-described anaesthesia  
87 protocol. However, the study included only 90 patients and was monocentric. The most recent  
88 study (13) using an identical design with infarct growth as the primary endpoint reported no  
89 differences between CS and GA. Clinical outcome at 90 days, tested as a secondary endpoint,

1  
2  
3 90 was better in the GA group. Finally, a meta-analysis analysing the pooled data of 7 trials (14)  
4  
5 91 reported that worse outcomes at 3 months were associated with GA. However, the choice to  
6  
7 92 treat a patient with or without GA was not randomized in the trials included in this meta-analysis  
8  
9 93 (14).

10  
11 94 So far, no study has assessed the clinical outcome 3 months after the stroke treatment  
12  
13 95 comparing GA and CS using standardized anaesthetic protocols and tight haemodynamic  
14  
15 96 control. Indeed, in previous studies (11,12,13), the anaesthesia protocol was either not  
16  
17 97 standardized or the doses not given, the blood pressure was controlled with vasoactives drugs  
18  
19 98 as different as dopamine and norepinephrine in the same study and the clinical outcome 3  
20  
21 99 months after the stroke was not the primary objective of one study (13). The recently published  
22  
23 100 post hoc analysis of the Siesta trial (15) reported no association between haemodynamic  
24  
25 101 variations and NIHSS change after 24 hours.”

26  
27  
28 102 Therefore, we designed a RCT comparing GA and CS during endovascular treatment for acute  
29  
30 103 stroke. Both GA and CS protocols will be standardized and the control of arterial blood  
31  
32 104 pressure too. We hypothesized that CS will be associated with a better clinical outcome  
33  
34 105 measured with the modified Rankin score (mRS) 3 months after the procedure. The Gass  
35  
36 106 study is the first multicentric RCT including a detailed anaesthesia protocol with a tight  
37  
38 107 haemodynamic control, comparing GA and CS during EVT and evaluating the functional  
39  
40 108 outcome at 3 months.

41  
42  
43 109  
44  
45  
46  
47  
48  
49  
50  
51  
52  
53  
54  
55  
56  
57  
58  
59  
60

## 110 **METHODS AND ANALYSIS**

### 111 **Trial design**

112 The GASS study is an investigator initiated, national, multicentre, randomised, simple-blind,  
113 parallel-group clinical trial with concealed allocation of patients scheduled to undergo  
114 endovascular therapy for stroke 1:1 to receive either a general anaesthesia protocol or a  
115 conscious sedation protocol. The trial will be conducted in four university and non-university  
116 centres. It started in September 2016 and will continue for a total of 36 months.

117

### 118 **Participant eligibility and consent**

119 Trial site investigators will identify consecutive eligible patients from the listed criteria. Eligible  
120 patients or a family member when appropriate will receive written and oral information and will  
121 be included after investigators have obtained informed written consent.

122

#### 123 Inclusion criteria

- 124 1. Adult (18 years or older) patients admitted to the participating centre
- 125 2. Occlusion of a large vessel in the anterior cerebral circulation
- 126 3. Undergoing endovascular therapy for stroke
- 127 4. Benefiting from the health insurance system
- 128 5. Signed informed consent from the patient or their legally next of kin

#### 129 Non-inclusion criteria

- 130 1. Pregnant or breast-feeding women
- 131 2. Patients already intubated and mechanical ventilated before inclusion in the study
- 132 3. Intracerebral haemorrhage associated with the ischemic stroke
- 133 4. Contra-indications to conscious sedation: Glasgow coma scale inferior to 8, agitation  
134 not allowing the patient to stay still during the procedure, deglutition disorders
- 135 5. Contra-indications to succinylcholine: hyperkalaemia, allergy
- 136 6. Body mass index superior to 35kg/m<sup>2</sup>
- 137 7. Allergy to one of the anaesthetic drugs

- 1  
2  
3 138 8. Uncontrolled hypotension,  
4  
5 139 9. Life-threatening comorbidity  
6  
7 140 10. Adults legally protected (under judicial protection, guardianship, or supervision),  
8  
9 141 persons deprived of their liberty  
10

11 142

### 143 **Allocation and blinding**

144 Patients will be randomised in two groups (general anaesthesia group and conscious sedation  
145 group). Randomisation will be done by investigators as close as possible to the endovascular  
146 therapy. Each patient will be given a unique randomisation number (patient code).  
147 Randomization will be stratified on the centre, the National Institute of Health Stroke Score  
148 (NIHSS  $\leq$  or  $>$  14) and the administration or not of IV thrombolysis. The primary evaluation  
149 criterion will be assessed blinded to the randomisation group. During the study period, outcome  
150 assessors will be kept blind to the randomisation group. Research nurses evaluating the  
151 outcomes 3 months after the treatment will not participate to the anaesthesia and will not be  
152 aware of the randomisation group. They will be blind to the treatment. The anaesthesiologist,  
153 the nurse anaesthesiologist, the neuroradiologist and the neurologist will not be blinded. They  
154 will not participate in the assessment of the patients at any time.

155 At each participating centre, data will be collected and entered into the electronic web-based  
156 case report form (eCRF) by trial or clinical trained personal (clinical research associate),  
157 blinded to the allocation group, under the supervision of the trial site investigators.

158

### 159 **Interventions**

160 All included patients will be allocated to one of the following two study groups:

- 161 • **General anaesthesia group:** patients will receive a standardised anaesthesia protocol  
162 with remifentanyl
- 163 • **Conscious sedation group:** patients will receive a standard conscious sedation with  
164 remifentanyl

165

1  
2  
3 166 *Standardized general anaesthesia will include:* Induction: Etomidate (0.25 – 0.4 mg/kg) and  
4  
5 167 succinylcholine (1 mg/kg) and maintenance: TCI propofol (maximum target: 4 microg/ml), TCI  
6  
7 168 remifentanil (0.5-4 ng/ml) and curares as needed.

9 169 *Standardized conscious sedation will include:* TCI remifentanil (maximum target 2 ng/ml), local  
10  
11 170 anaesthesia with lidocaine 10 mg/ml (maximum 10 ml). Oxygen will be administered only if  
12  
13 171  $SPO_2 \leq 96\%$ . Respiratory rate and capnography will be monitored.

15 172 Conscious sedation can be converted into a general anaesthesia in the following situations:

- 17 173
- 18 173 • Agitation or restlessness not allowing the endovascular therapy
  - 19 174 • Vomiting not allowing the endovascular therapy
  - 20 174
  - 21 175 • Glasgow coma scale  $< 8$  and /or deglutition disorders
  - 22 175
  - 23 176 • Severe hypoxemia with  $SPO_2 < 96\%$  with oxygen delivered with a high concentration
  - 24 177 mask (10 l/min maximum)
  - 25 177
  - 26 178 • Respiratory depression with respiratory rate  $> 35$  /min and/or clinical signs of
  - 27 179 respiratory exhaustion
  - 28 179

29 180  
30  
31 181 In both groups:

32  
33 182 intraoperative dose changes will be left to the anaesthesiologist in charge of the patient if  
34  
35 183 necessary, IV norepinephrine will be administered in order to maintain blood pressure (BP)  
36  
37 184 within the recommended range: systolic blood pressure (SBP) between 140 and 185 mmHg;  
38  
39 185 diastolic blood pressure (DBP)  $< 110$  mmHg. A drop of more than 25% of the mean blood  
40  
41 186 pressure (MBP) will also be avoided. Norepinephrine will be administered in a dedicated  
42  
43 187 intravenous line and diluted at 250 microg/ml.

44  
45 188 A systematic immediate post-EVT Cone-beal CT scan will be performed for all patients

46  
47 189 Decisions about all other aspects of patient care will be performed according to the expertise  
48  
49 190 of the staff at each centre and to routine clinical practice to minimize interference with the trial  
50  
51 191 intervention. Three months after the thrombectomy, patients will consult with a neurologist.

52  
53 192

## 54 193 **Outcome measures**

55  
56 194 Primary outcome measure

1  
2  
3 195 The primary outcome measure will be the neurological outcome assessed with the modified  
4  
5 196 Rankin score 3 months (16) after the endovascular therapy. Success will be considered as a  
6  
7 197 modified Rankin score  $\leq 2$ . The modified Rankin score (mRS) will be assessed by trained  
8  
9 198 research nurse blinded to the randomisation group.

11 199 An additional exploratory analysis of the primary endpoint will be performed to assess  
12  
13 200 treatments effects according to baseline NIHSS ( $\leq$  or  $> 14$ ) and the administration or not of IV  
14  
15 201 thrombolysis.

16  
17  
18 202

19  
20 203 Secondary outcomes measures

- 21  
22 204 • Time between the beginning of the clinical symptoms and the last angiography  
23  
24 205 • Time between the arrival of the patient at the stroke center and the beginning of the  
25  
26 206 endovascular therapy (time of puncture)  
27  
28 207 • Quality of the recanalization after the endovascular treatment evaluated by the  
29  
30 208 neuroradiologist (not blinded). A good quality recanalization corresponds to a 2b or 3  
31  
32 209 modified treatment in cerebral ischemia scale (mTICI) (17)  
33  
34 210 • NIHSS score at Day 1 (day after the endovascular treatment) and Day 7 (or the day  
35  
36 211 the patient leaves the hospital if scheduled before D7) (18)  
37  
38 212 • Complications during the procedure (dissection, rupture of the artery, thrombus in  
39  
40 213 another territory)  
41  
42 214 • Mortality rate 3 months after the endovascular treatment  
43  
44 215 • Number of hypo- or hypertension events during the procedure and the first 24 hours  
45  
46 216 after the procedure (hypotension defined as SBP  $< 140$  mmHg or a drop of the MBP of  
47  
48 217 40% or more, hypertension defined as SBP  $> 185$  mmHg or DBP  $> 110$  mmHg)  
49  
50 218 • Number of patients who received norepinephrine  
51  
52 219 • Number of conversion of conscious sedation to general anaesthesia  
53  
54  
55

56 220

57  
58 221 **Statistical analysis**  
59  
60



1  
2  
3 222 Statistical analysis will be performed on all randomized and evaluated patients (intention to  
4  
5 223 treat analysis). It will be performed with SAS software (SAS Institute, Cary, NC, USA) in the  
6  
7 224 Methodology/Biometrics department of the Inserm 1414 Clinical Investigation Centre of  
8  
9 225 Rennes. A first overall descriptive analysis and analysis by group will be performed. This  
10  
11 226 consists of separate estimates, numbers and percentages for qualitative variables, means,  
12  
13 227 standard error, medians and interquartile intervals for quantitative variables. The normal  
14  
15 228 feature of the distribution of quantitative variables will be checked. Student's t test or a Mann-  
16  
17 229 Whitney test if necessary will be used to compare quantitative variables, and a Chi<sup>2</sup> or Fisher's  
18  
19 230 exact test if necessary will be used to compare qualitative variables between two groups at  
20  
21 231 inclusion. The primary endpoint will be compared between the two groups with the Chi<sup>2</sup> test.  
22  
23 232 Two interim analyses after inclusion of 1/3 and 2/3 of the patients, and one final analysis are  
24  
25 233 planned. Stopping rules will use the alpha spending function with the O'Brien-Fleming  
26  
27 234 boundary. The cumulative values of alpha for each analysis are: 0.00021 at the first analysis,  
28  
29 235 0.01202 at the second analysis and 0.04626 at the final analysis (nTerim, V1.1, Statistical  
30  
31 236 solutions Ltd, Cork, Ireland). The trial will be stopped early if the significance of the Chi<sup>2</sup> test is  
32  
33 237 below these alpha values. For the analysis of the other endpoints, the same strategy as for  
34  
35 238 baseline comparisons will be used. Continuous endpoints repeatedly measured during the  
36  
37 239 study will be compared using a repeated measure two-way (time, group) analysis of variance.  
38  
39 240 For all these analyses, adjustments can be made in case of heterogeneity at inclusion. Except  
40  
41 241 for the interim analyses, a p value <0.05 will be considered as significant for all analyses.  
42  
43  
44  
45  
46

242

### 243 **Missing values**

244 Missing data will not be replaced. Mixed models can be used in analysis of repeated data to  
245 avoid deleting subjects with any missing values.

246

### 247 **Sample size estimation**

248 A previous study reported 30% of the patients with a mRS score  $\leq 2$  after endovascular therapy  
249 under general anaesthesia (19). We aim to show an increase of patients with a good prognostic

1  
2  
3 250 (defined as mRS  $\leq$  2) up to 45% after endovascular treatment under conscious sedation.  
4  
5 251 Therefore, 166 patients per group will be needed to have 80% power, at a two-sided alpha  
6  
7 252 level of 0.05. A total of 350 patients will be included to take into account non-evaluable patients  
8  
9 253 and drop outs.  
10

11 254

### 13 255 **Data Registration**

15 256 Data will be entered into the web- based electronic case report form (eCRF) by trial or clinical  
16  
17 257 personnel under the supervision of the trial site investigators at each participating centre. From  
18  
19 258 the eCRF the trial database will be established. Data collection will be monitored by trained  
20  
21 259 research coordinators.  
22

23 260

24  
25  
26 261 The following data will be registered:

#### 27 262 Baseline characteristics at randomisation:

28  
29  
30 263 Demographic data (age, height, weight, gender and body mass index); American Society of  
31  
32 264 Anaesthesiologists (ASA) physical status; significant comorbidities (cardio-vascular,  
33  
34 265 respiratory, neurologic , psychiatric and /or abdominal disease, cancer, preoperative  
35  
36 266 chemotherapy or radiotherapy), NIHSS score, time of arrival at the hospital, time of the  
37  
38 267 beginning of the symptoms, time of the cerebral angiography or MRI (meaning time of first  
39  
40 268 image for diagnosis) , time between the first contact of the patient with the anaesthesiologist  
41  
42 269 and the induction of anaesthesia (GA or CS),localisation of the stroke, IV fibrinolysis if  
43  
44 270 applicable, creatinine clearance, haemostasis (PT and ACT if available).  
45

#### 46 271 Intraoperative data:

47  
48  
49 272 Time of arterial puncture, time of recanalization, mTICI score (16), doses of norepinephrine,  
50  
51 273 intraoperative complications (hypotension defined as SBP < 140 mmHg or a drop of the MBP  
52  
53 274 of 40% or more, hypertension defined as SBP> 185 mmHg or DBP > 110 mmHg) necessity to  
54  
55 275 convert the conscious sedation onto a general anaesthesia, duration of anaesthesia and  
56  
57 276 procedure, procedure related complications (distal embolization in a different territory,  
58  
59 277 intramural arterial dissection, arterial perforation, access-site complications leading to surgery).  
60

1  
2  
3 278  
4

5 279 Postoperative data:  
6

7 280 The following data will be collected:  
8

- 9 281 • NIHSS day 1 and Day 7 or the day the patient leaves the hospital if before Day 7
- 10 282 • Necessity of noradrenaline during the first 2 hours after the endovascular treatment
- 11 283 • Hypo-or hypertension events as defined above during first 24 hours
- 12 284 • Bradycardie with atropine treatment during first 24 hours
- 13 285 • Hospitalization in intensive care unit
- 14 286 • Number of hours of invasive ventilation
- 15 287 • Pneumonia
- 16 288 • Death until the final call for mRS (3 months after the procedure)
- 17 289 • mRS 3 months after the procedure during a telephone interview (20).  
18  
19  
20  
21  
22  
23  
24  
25  
26  
27  
28

29 290  
30

31 291 **Patient withdrawal**  
32

33 292 A participant who no longer agrees to participate in the clinical trial can withdraw the informed  
34 293 consent at any time without need of further explanation. Participants who will withdraw from  
35 294 the study will be followed up, according to routine clinical practice in each participating centre.  
36 295 In order to conduct intention-to-treat analyses with as little missing data as possible, the  
37 296 investigator may ask the participant which aspects of the trial he/she wishes to withdraw from  
38 297 (participation in the remaining follow-up assessments, use of already collected data).  
39 298 Whenever possible, the participant will be asked for permission to obtain data for the primary  
40 299 outcome measure. All randomised patients will be reported, and all data available with consent  
41 300 will be used in the analyses. If appropriate, missing data will be handled in accordance with  
42 301 multiple imputation procedures if missing data are greater than 5%.  
43  
44  
45  
46  
47  
48  
49  
50  
51  
52  
53

54 302  
55

56 303 **Safety**  
57

58 304 Every serious adverse event related to the studied treatment or not, expected or unexpected,  
59  
60

1  
2  
3 305 will be reported within 24 hours by the investigator to the sponsor on a "Serious adverse event"  
4  
5 306 form on which will be indicated the date of occurrence, criterion of severity, intensity,  
6  
7 307 relationship with the treatment (or the study) evaluated, and the outcome. The period in which  
8  
9 308 serious adverse events should be reported begins from the day of the written informed consent  
10  
11 309 to the end of the follow-up (day of the evaluation of mRS 3 to 4 months after the procedure).  
12  
13 310 Whenever a serious adverse event persists at the end of the study, the investigator will follow  
14  
15 311 the patient until the event is considered resolved. The following events: hypo- or hypertension  
16  
17 312 will be recorded as study endpoints criterion in the case report form. In order to avoid collection  
18  
19 313 duplication, they will not be reported on the "adverse event" page of the case report form. As  
20  
21 314 planned in the study, they will be analysed at the time of interim analyses (two interim analyses  
22  
23 315 after inclusion of 1/3 and 2/3 of the patients) which will permit to show potential difference  
24  
25 316 between the two groups during the study.  
26  
27 317 In addition, serious adverse events will be submitted to the data monitoring and safety  
28  
29 318 committee (DMSC). The DMSC is independent of the trial investigators and will perform an  
30  
31 319 ongoing review of safety parameters and overall study conduct. The DMSC is comprised of a  
32  
33 320 neurologist, an anaesthesiologist, a neuroradiologist, a pharmacologist and a methodologist.  
34  
35 321 The DMSC will be responsible for safeguarding the interests of trial participants, assessing the  
36  
37 322 safety and efficacy of the interventions during the trial, and for monitoring the overall conduct  
38  
39 323 of the clinical trial. To contribute to enhancing the integrity of the trial, the DMSC may also  
40  
41 324 formulate recommendations relating to the recruitment/retention of participants, their  
42  
43 325 management, improving adherence to protocol-specified regimens and retention of  
44  
45 326 participants, and the procedures for data management and quality control. Recommendations  
46  
47 327 for pausing or stopping the study will be made by the DMSC in case of serious adverse  
48  
49 328 reactions and suspected unexpected serious adverse reaction.  
50  
51 329 All adverse events for which the investigator or the sponsor considers that a causal relationship  
52  
53 330 with the investigational medicinal products can be reasonably considered, will be considered  
54  
55 331 as suspected adverse reactions. If they are unexpected, they are qualified as being Suspected  
56  
57 332 Unexpected SAR (SUSAR) and will be notified in a report by the sponsor to Eudravigilance  
58  
59  
60

1  
2  
3 333 (European pharmacovigilance database) and to local regulatory agency within the regulatory  
4  
5 334 time periods for reporting: Immediate declaration if seriousness criteria is death or life-  
6  
7 335 threatening condition, declaration within 15 days for other seriousness criteria.  
8

9 336

### 11 337 **Data handling and retention**

13 338 Data will be handled according to French law. All original records (including consent forms,  
14  
15 339 reports of suspected unexpected serious adverse reactions and relevant correspondences)  
16  
17 340 will be archived at trial sites for 15 years. The clean trial database file will be anonymised and  
18  
19 341 maintained for 15 years.  
20

21 342

### 24 343 **Patient and public involvement**

26 344 Patient and public were not involved in any of the phases of this study  
27

28 345

## 30 346 **ETHICS AND DISSEMINATION**

31 347

### 34 348 **Ethical and legislative approvals**

36 349 GASS trial was approved by the French National Safety and Drug Agency (Agence Nationale  
37  
38 de Sécurité du Médicament (September 8<sup>th</sup>, 2016). By June 13<sup>th</sup>, 2016, the study has been  
39 350 approved for all centres by a central ethics committee (Comité de Protection des Personnes  
40  
41 351 de Poitiers). The GASS trial is registered in the European Clinical Trials Database (EudraCT  
42  
43 352 2016-000795-25) and at ClinicalTrials.gov with the trial identification number NCT02822144.  
44  
45 353 Trial methods and results will be reported according to the Consolidated Standards of  
46  
47 354 Reporting Trials (CONSORT) 2010 guidelines (21).  
48  
49 355

50 356

### 53 357 **Publication plan**

55 358 Scientific presentations and reports corresponding to the study will be written under the  
56  
57 359 responsibility of the coordinating investigator of the study with the agreement of the principal  
58  
59 360 investigators and the methodologist. The co-authors of the report and of publications will be

1  
2  
3 361 the investigators and clinicians involved, on a pro rata basis of their contribution in the study,  
4  
5 362 as well as the biostatistician and associated researchers. All trial sites will be acknowledged,  
6  
7 363 and all investigators at these sites will appear with their names under ‘the GASS investigators’  
8  
9 364 in an Appendix to the final manuscript. Rules on publication will follow international  
10  
11 365 recommendations (22).

12  
13 366

14  
15 367

16  
17  
18 368 **Contributors:** Axelle Maurice (AM) contributed to the conception and design of the research  
19  
20 369 protocol and wrote the research protocol. Helene Beloeil (HB) provided critical input pertaining  
21  
22 370 to the design of the trial interventions and procedures. AM wrote the first draft of the protocol  
23  
24 371 and HB this manuscript. Bruno Laviolle (BL) designed the study and its statistical analysis plan.  
25  
26 372 All authors (AM, JCF, TR, JMD, AS, BL, HB) critically revised and modified the protocol and  
27  
28 373 the article. They all approved the final version to be published.

29  
30 374

31  
32 375 **Funding:** GASS trial is supported by funding from French Ministry of Health (Programme  
33  
34 376 Hospitalier de Recherché Clinique Inter regional (PHRCI 2015).

35  
36 377 The funding sources had no role in the trial design, trial conduct, data handling, data analysis  
37  
38 378 or writing and publication of the manuscript.

39  
40 379

41  
42  
43 380 **Sponsor:** CHU de Rennes, Direction de la recherché Clinique, 2 avenue Henri Le Guilloux,  
44  
45 381 35033 Rennes Cedex, France. The sponsor had no role in the trial design, trial conduct, data  
46  
47 382 handling, data analysis or writing and publication of the manuscript.

48  
49 383

50  
51 384

52  
53 385 **Competing interests:** None

54  
55 386

56  
57 387 **References**

58  
59  
60

- 1- Berkhemer OA, Fransen PS, Beumer D, van den Berg LA, Lingsma HF, et al. MR CLEAN Investigators. A randomized trial of intra-arterial treatment for acute ischemic stroke. *N Engl J Med*. 2015; 372:11-20.
- 2- Goyal M, Demchuk AM, Menon BK, Eesa M, Rempel JL, et al. ESCAPE Trial Investigators. Randomized Assessment of Rapid Endovascular Treatment of Ischemic Stroke. *N Engl J Med*. 2015; 372:1019-30.
- 3- Campbell BC, Mitchell PJ, Kleinig TJ, Dewey HM, Churilov L, and al. EXTEND-IA Investigators. Endovascular therapy for ischemic stroke with perfusion-imaging selection. *N Engl J Med*. 2015; 372:1009-18.
- 4- Nogueira RG, Smith WS, Sung G, et al. Effect of time to reperfusion on clinical outcome of anterior circulation strokes treated with thrombectomy: pooled analysis of the MERCI and Multi MERCI trials. *Stroke*. 2011; 42: 3144–9.
- 5- Davis MJ, Menon BK, Baghirzada LB, Campos-Herrera CR, Goyal M, Hill MD, Archer DP; Calgary Stroke Program. Aesthetic management and outcome in patients during endovascular therapy for acute stroke. *Anesthesiology*. 2012;116:396-405.
- 6- Löwhagen Hendén P, Rentzos A, Karlsson JE, Rosengren L, Sundeman H, Reinsfelt B, Ricksten SE. Hypotension During Endovascular Treatment of Ischemic Stroke Is a Risk Factor for Poor Neurological Outcome. *Stroke*. 2015; 46:2678-2680.
- 7- Whalin MK, Halenda KM, Hauszen DC, Rebello LC, Frankel MR, Gershon RY, Nogueira RG. Even Small Decreases in Blood Pressure during Conscious Sedation Affect Clinical Outcome after Stroke Thrombectomy: An Analysis of Hemodynamic Thresholds. *AJNR Am J Neuroradiol*. 2017;38:294-298.
- 8- Berkhemer OA, van den Berg LA, Fransen PS, Beumer D, Yoo AJ, Lingsma HF, Schonewille WJ, van den Berg R, Wermer MJ, Boiten J, Lycklama À Nijeholt GJ, Nederkoorn PJ, Hollmann MW, van Zwam WH, van der Lugt A, van Oostenbrugge RJ, Majoie CB, Dippel DW, Roos YB; MR CLEAN investigators. The effect of anaesthetic management during intra-arterial therapy for acute stroke in MR CLEAN. *Neurology*. 2016 ;87:656-64.
- 9- Abou-Chebl A, Yeatts SD, Yan B, Cockroft K, Goyal M, Jovin T, Khatri P, Meyers P, Spilker J, Sugg R, Wartenberg KE, Tomsick T, Broderick J, Hill MD. Impact of General Anesthesia on Safety and Outcomes in the Endovascular Arm of interventional Management of Stroke (IMS) III Trial. *Stroke*. 2015;46:2142-8.
- 10- Bekelis K, Missios S, MacKenzie TA, Tjoumakaris S, Jabbour P. Anesthesia Technique and Outcomes of Mechanical Thrombectomy in Patients with Acute Ischemic Stroke. *Stroke* 2017 ;48:361-366.

- 1  
2  
3 424 11- Schönenberger S, Uhlmann L, Hacke W, Schieber S, Mundiyanapurath S,  
4 425 Purrucker JC, Nagel S, Klose C, Pfaff J, Bendszus M, Ringleb PA, Kieser M,  
5 426 Möhlenbruch MA, Bösel J. Effect of Conscious Sedation vs General Anesthesia on  
6 427 Early Neurological Improvement Among Patients with Ischemic Stroke Undergoing  
7 428 Endovascular Thrombectomy: A Randomized Clinical Trial. JAMA.  
8 429 2016;316 :1986-1996.
- 12 430 12- Löwhagen Henden P, Rentzos A, Karlsson JE, Rosengren L, Leiram B, et al.  
13 431 General anaesthesia versus conscious sedation for endovascular treatment of  
14 432 acute ischaemic stroke : the anstroke trial (anaesthesia during stroke). Stroke 2017 ;  
15 433 48 : 1601-1607.
- 19 434 13- Simonsen CZ, Yoo AJ, Sørensen LH, Juul N, Johnsen SP, Andersen G,  
20 435 Rasmussen M. Effect of General Anesthesia and Conscious Sedation During  
21 436 Endovascular Therapy on Infarct Growth and Clinical Outcomes in Acute Ischemic  
22 437 Stroke: A Randomized Clinical Trial JAMA Neurol. 2018 ;75(470-477).
- 25 438 14- Campbell BCV, van Zwam WH, Menon BK, Dippel DWJ, Demchuk AM, Bracad S  
26 439 et al. Effect of general anaesthesia on functional outcome in patients with anterior  
27 440 circulation ischaemic stroke having endovascular thrombectomy versus standard  
28 441 of care: a meta-analysis of individual patient data. Lancet neurol 2018; 17:47-53.
- 32 442 15- Schönenberger S, Uhlmann L, Ungerer M, Pfaff J, Nagel S, Kose C, et al.  
33 443 Association of blood pressure with short-and long-term functional outcome after  
34 444 stroke thrombectomy: post hoc analysis of the siest trial. Stroke 2018; 49: 1451-  
35 445 1456.
- 38 446 16- Banks JL, Marotta CA. Outcomes Validity and Reliability of the Modified Rankin  
39 447 Scale: Implications for Stroke Clinical Trials. A Literature Review and Synthesis.  
40 448 Stroke. 2007; 38:1091-1096.
- 43 449 17- Zaidat OO, Yoo AJ, Khatri P, Tomsick TA, von Kummer R, Saver JL, et al. Cerebral  
44 450 Angiographic Revascularization Grading (CARG) Collaborators; STIR  
45 451 Revascularization working group; STIR Thrombolysis in Cerebral Infarction (TICI)  
46 452 Task Force. Recommendations on angiographic revascularization grading  
47 453 standards for acute ischemic stroke: a consensus statement. Stroke.  
48 454 2013 ;44:2650-2663.
- 52 455 18- Brott T, Adams HP, Olinger CP, Marler JR, Barsan WG, Biller J, SpilkerJ, Holleran  
53 456 R, Eberle R, Hertzberg V, Rorick M, Moomaw CJ, Walker M. Measurements of  
54 457 acute cerebral infarction: a clinical examination scale. Stroke. 1989; 20:864–870.
- 57 458 19- Abou-Chebl A, Lin R, Hussain MS, Jovin TG, Levy EI, Liebeskind DS, et al.  
58 459 Conscious sedation versus general anaesthesia during endovascular therapy for  
59 459  
60



- 1  
2  
3 460 acute anterior circulation stroke: preliminary results from a retrospective,  
4 461 multicentre study. Stroke. 2010; 41:1175-79.  
5  
6 462 20- Bruno A, Akinwuntan AE, Lin C, Close B, Davis K, Baute V et al. Simplified modified  
7  
8 463 rankin scale questionnaire. Reproducibility over the telephone and validation with  
9  
10 464 quality of life. Stroke 2011; 42:2276-9.  
11 465 21- Schulz KF, Altman DG, Moher D, et al. CONSORT 2010 statement: updated  
12  
13 466 guidelines for reporting parallel group randomised trials. BMJ 2010;340:c332.  
14 467 22- International Committee of Medical Journal E. Uniform requirements for  
15  
16 468 manuscripts submitted to biomedical journals. The New England journal of  
17  
18 469 medicine 1997;336(4):309-15  
19  
20  
21  
22  
23  
24  
25  
26  
27  
28  
29  
30  
31  
32  
33  
34  
35  
36  
37  
38  
39  
40  
41  
42  
43  
44  
45  
46  
47  
48  
49  
50  
51  
52  
53  
54  
55  
56  
57  
58  
59  
60

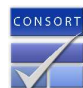

## CONSORT 2010 checklist of information to include when reporting a randomised trial\*

| Section/Topic                    | Item No | Checklist item                                                                                                                                                                              | Reported on page No |
|----------------------------------|---------|---------------------------------------------------------------------------------------------------------------------------------------------------------------------------------------------|---------------------|
| <b>Title and abstract</b>        |         |                                                                                                                                                                                             |                     |
|                                  | 1a      | Identification as a randomised trial in the title                                                                                                                                           | Page 1              |
|                                  | 1b      | Structured summary of trial design, methods, results, and conclusions (for specific guidance see CONSORT for abstracts)                                                                     | Page 2              |
| <b>Introduction</b>              |         |                                                                                                                                                                                             |                     |
| Background and objectives        | 2a      | Scientific background and explanation of rationale                                                                                                                                          | Pages 4&5           |
|                                  | 2b      | Specific objectives or hypotheses                                                                                                                                                           | Page 5              |
| <b>Methods</b>                   |         |                                                                                                                                                                                             |                     |
| Trial design                     | 3a      | Description of trial design (such as parallel, factorial) including allocation ratio                                                                                                        | Page 6              |
|                                  | 3b      | Important changes to methods after trial commencement (such as eligibility criteria), with reasons                                                                                          | NA                  |
| Participants                     | 4a      | Eligibility criteria for participants                                                                                                                                                       | Page 6              |
|                                  | 4b      | Settings and locations where the data were collected                                                                                                                                        | Page 6              |
| Interventions                    | 5       | The interventions for each group with sufficient details to allow replication, including how and when they were actually administered                                                       | Pages 7&8           |
| Outcomes                         | 6a      | Completely defined pre-specified primary and secondary outcome measures, including how and when they were assessed                                                                          | Page 9              |
|                                  | 6b      | Any changes to trial outcomes after the trial commenced, with reasons                                                                                                                       | NA                  |
| Sample size                      | 7a      | How sample size was determined                                                                                                                                                              | Page 11             |
|                                  | 7b      | When applicable, explanation of any interim analyses and stopping guidelines                                                                                                                | Page 10             |
| <b>Randomisation:</b>            |         |                                                                                                                                                                                             |                     |
| Sequence generation              | 8a      | Method used to generate the random allocation sequence                                                                                                                                      | Page 7              |
|                                  | 8b      | Type of randomisation; details of any restriction (such as blocking and block size)                                                                                                         | Page 7              |
| Allocation concealment mechanism | 9       | Mechanism used to implement the random allocation sequence (such as sequentially numbered containers), describing any steps taken to conceal the sequence until interventions were assigned | Page 7              |
| Implementation                   | 10      | Who generated the random allocation sequence, who enrolled participants, and who assigned participants to interventions                                                                     | Page 7              |
| Blinding                         | 11a     | If done, who was blinded after assignment to interventions (for example, participants, care providers, those                                                                                | Page 7              |

|                                                      |     |                                                                                                                                                   |         |
|------------------------------------------------------|-----|---------------------------------------------------------------------------------------------------------------------------------------------------|---------|
|                                                      |     | assessing outcomes) and how                                                                                                                       |         |
|                                                      | 11b | If relevant, description of the similarity of interventions                                                                                       | NA      |
| Statistical methods                                  | 12a | Statistical methods used to compare groups for primary and secondary outcomes                                                                     | Page 10 |
|                                                      | 12b | Methods for additional analyses, such as subgroup analyses and adjusted analyses                                                                  | Page 10 |
| <b>Results</b>                                       |     |                                                                                                                                                   |         |
| Participant flow (a diagram is strongly recommended) | 13a | For each group, the numbers of participants who were randomly assigned, received intended treatment, and were analysed for the primary outcome    | NA      |
|                                                      | 13b | For each group, losses and exclusions after randomisation, together with reasons                                                                  |         |
| Recruitment                                          | 14a | Dates defining the periods of recruitment and follow-up                                                                                           |         |
|                                                      | 14b | Why the trial ended or was stopped                                                                                                                |         |
| Baseline data                                        | 15  | A table showing baseline demographic and clinical characteristics for each group                                                                  |         |
| Numbers analysed                                     | 16  | For each group, number of participants (denominator) included in each analysis and whether the analysis was by original assigned groups           |         |
| Outcomes and estimation                              | 17a | For each primary and secondary outcome, results for each group, and the estimated effect size and its precision (such as 95% confidence interval) |         |
|                                                      | 17b | For binary outcomes, presentation of both absolute and relative effect sizes is recommended                                                       |         |
| Ancillary analyses                                   | 18  | Results of any other analyses performed, including subgroup analyses and adjusted analyses, distinguishing pre-specified from exploratory         |         |
| Harms                                                | 19  | All important harms or unintended effects in each group (for specific guidance see CONSORT for harms)                                             |         |
| <b>Discussion</b>                                    |     |                                                                                                                                                   |         |
| Limitations                                          | 20  | Trial limitations, addressing sources of potential bias, imprecision, and, if relevant, multiplicity of analyses                                  |         |
| Generalisability                                     | 21  | Generalisability (external validity, applicability) of the trial findings                                                                         |         |
| Interpretation                                       | 22  | Interpretation consistent with results, balancing benefits and harms, and considering other relevant evidence                                     |         |
| <b>Other information</b>                             |     |                                                                                                                                                   |         |
| Registration                                         | 23  | Registration number and name of trial registry                                                                                                    | Page 2  |
| Protocol                                             | 24  | Where the full trial protocol can be accessed, if available                                                                                       | NA      |
| Funding                                              | 25  | Sources of funding and other support (such as supply of drugs), role of funders                                                                   | Page 15 |

\*We strongly recommend reading this statement in conjunction with the CONSORT 2010 Explanation and Elaboration for important clarifications on all the items. If relevant, we also recommend reading CONSORT extensions for cluster randomised trials, non-inferiority and equivalence trials, non-pharmacological treatments, herbal interventions, and pragmatic trials. Additional extensions are forthcoming: for those and for up to date references relevant to this checklist, see [www.consort-statement.org](http://www.consort-statement.org).

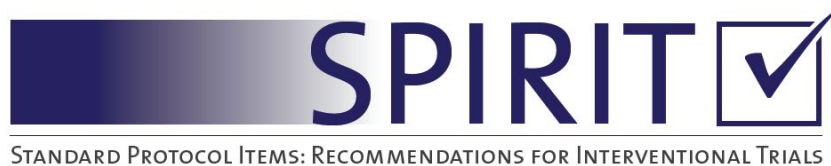

STANDARD PROTOCOL ITEMS: RECOMMENDATIONS FOR INTERVENTIONAL TRIALS

SPIRIT 2013 Checklist: Recommended items to address in a clinical trial protocol and related documents\*

| Section/item                      | Item No | Description                                                                                                                                                                                                                                                                                                         |
|-----------------------------------|---------|---------------------------------------------------------------------------------------------------------------------------------------------------------------------------------------------------------------------------------------------------------------------------------------------------------------------|
| <b>Administrative information</b> |         |                                                                                                                                                                                                                                                                                                                     |
| Title                             | 1       | Descriptive title identifying the study design, population, interventions, and, if applicable, trial acronym <a href="#">page 1</a>                                                                                                                                                                                 |
| Trial registration                | 2a      | Trial identifier and registry name. If not yet registered, name of intended registry <a href="#">page 2</a>                                                                                                                                                                                                         |
|                                   | 2b      | All items from the World Health Organization Trial Registration Data Set <a href="#">NA</a>                                                                                                                                                                                                                         |
| Protocol version                  | 3       | Date and version identifier <a href="#">NA</a>                                                                                                                                                                                                                                                                      |
| Funding                           | 4       | Sources and types of financial, material, and other support <a href="#">page 15</a>                                                                                                                                                                                                                                 |
| Roles and responsibilities        | 5a      | Names, affiliations, and roles of protocol contributors <a href="#">page 1</a>                                                                                                                                                                                                                                      |
|                                   | 5b      | Name and contact information for the trial sponsor <a href="#">page 15-16</a>                                                                                                                                                                                                                                       |
|                                   | 5c      | Role of study sponsor and funders, if any, in study design; collection, management, analysis, and interpretation of data; writing of the report; and the decision to submit the report for publication, including whether they will have ultimate authority over any of these activities <a href="#">page 15-16</a> |
|                                   | 5d      | Composition, roles, and responsibilities of the coordinating centre, steering committee, endpoint adjudication committee, data management team, and other individuals or groups overseeing the trial, if applicable (see Item 21a for data monitoring committee) <a href="#">page 13</a>                            |
| <b>Introduction</b>               |         |                                                                                                                                                                                                                                                                                                                     |
| Background and rationale          | 6a      | Description of research question and justification for undertaking the trial, including summary of relevant studies (published and unpublished) examining benefits and harms for each intervention <a href="#">page 4-5</a>                                                                                         |
|                                   | 6b      | Explanation for choice of comparators <a href="#">page 4-5</a>                                                                                                                                                                                                                                                      |
| Objectives                        | 7       | Specific objectives or hypotheses <a href="#">page 5</a>                                                                                                                                                                                                                                                            |

1  
2  
3  
4  
5  
6  
7  
8  
9  
10  
11  
12  
13  
14  
15  
16  
17  
18  
19  
20  
21  
22  
23  
24  
25  
26  
27  
28  
29  
30  
31  
32  
33  
34  
35  
36  
37  
38  
39  
40  
41  
42  
43  
44  
45  
46  
47  
48  
49  
50  
51  
52  
53  
54  
55  
56  
57  
58  
59  
60

Trial design 8 Description of trial design including type of trial (eg, parallel group, crossover, factorial, single group), allocation ratio, and framework (eg, superiority, equivalence, noninferiority, exploratory) [page 6](#)

### Methods: Participants, interventions, and outcomes

Study setting 9 Description of study settings (eg, community clinic, academic hospital) and list of countries where data will be collected. Reference to where list of study sites can be obtained [page 6](#)

Eligibility criteria 10 Inclusion and exclusion criteria for participants. If applicable, eligibility criteria for study centres and individuals who will perform the interventions (eg, surgeons, psychotherapists) [page 6](#)

Interventions 11a Interventions for each group with sufficient detail to allow replication, including how and when they will be administered [page 7-8](#)

11b Criteria for discontinuing or modifying allocated interventions for a given trial participant (eg, drug dose change in response to harms, participant request, or improving/worsening disease) [page 8](#)

11c Strategies to improve adherence to intervention protocols, and any procedures for monitoring adherence (eg, drug tablet return, laboratory tests) [NA](#)

11d Relevant concomitant care and interventions that are permitted or prohibited during the trial [page 8](#)

Outcomes 12 Primary, secondary, and other outcomes, including the specific measurement variable (eg, systolic blood pressure), analysis metric (eg, change from baseline, final value, time to event), method of aggregation (eg, median, proportion), and time point for each outcome. Explanation of the clinical relevance of chosen efficacy and harm outcomes is strongly recommended [page 9](#)

Participant timeline 13 Time schedule of enrolment, interventions (including any run-ins and washouts), assessments, and visits for participants. A schematic diagram is highly recommended (see Figure) [page 9](#)

Sample size 14 Estimated number of participants needed to achieve study objectives and how it was determined, including clinical and statistical assumptions supporting any sample size calculations [page 10-11](#)

Recruitment 15 Strategies for achieving adequate participant enrolment to reach target sample size [page 10-11](#)

### Methods: Assignment of interventions (for controlled trials)

Allocation:

|    |                |     |                                                                          |
|----|----------------|-----|--------------------------------------------------------------------------|
| 1  |                |     |                                                                          |
| 2  | Sequence       | 16a | Method of generating the allocation sequence (eg, computer-              |
| 3  | generation     |     | generated random numbers), and list of any factors for stratification.   |
| 4  |                |     | To reduce predictability of a random sequence, details of any planned    |
| 5  |                |     | restriction (eg, blocking) should be provided in a separate document     |
| 6  |                |     | that is unavailable to those who enrol participants or assign            |
| 7  |                |     | interventions <a href="#">page 7</a>                                     |
| 8  |                |     |                                                                          |
| 9  |                |     |                                                                          |
| 10 | Allocation     | 16b | Mechanism of implementing the allocation sequence (eg, central           |
| 11 | concealment    |     | telephone; sequentially numbered, opaque, sealed envelopes),             |
| 12 | mechanism      |     | describing any steps to conceal the sequence until interventions are     |
| 13 |                |     | assigned <a href="#">page 7</a>                                          |
| 14 |                |     |                                                                          |
| 15 | Implementation | 16c | Who will generate the allocation sequence, who will enrol participants,  |
| 16 |                |     | and who will assign participants to interventions <a href="#">page 7</a> |
| 17 |                |     |                                                                          |
| 18 |                |     |                                                                          |
| 19 | Blinding       | 17a | Who will be blinded after assignment to interventions (eg, trial         |
| 20 | (masking)      |     | participants, care providers, outcome assessors, data analysts), and     |
| 21 |                |     | how <a href="#">page 7</a>                                               |
| 22 |                |     |                                                                          |
| 23 |                | 17b | If blinded, circumstances under which unblinding is permissible, and     |
| 24 |                |     | procedure for revealing a participant's allocated intervention during    |
| 25 |                |     | the trial                                                                |
| 26 |                |     |                                                                          |
| 27 |                |     |                                                                          |

### Methods: Data collection, management, and analysis

|    |                 |     |                                                                                    |
|----|-----------------|-----|------------------------------------------------------------------------------------|
| 28 |                 |     |                                                                                    |
| 29 |                 |     |                                                                                    |
| 30 | Data collection | 18a | Plans for assessment and collection of outcome, baseline, and other                |
| 31 | methods         |     | trial data, including any related processes to promote data quality (eg,           |
| 32 |                 |     | duplicate measurements, training of assessors) and a description of                |
| 33 |                 |     | study instruments (eg, questionnaires, laboratory tests) along with                |
| 34 |                 |     | their reliability and validity, if known. Reference to where data                  |
| 35 |                 |     | collection forms can be found, if not in the protocol <a href="#">page 11-12</a>   |
| 36 |                 |     |                                                                                    |
| 37 |                 |     |                                                                                    |
| 38 |                 | 18b | Plans to promote participant retention and complete follow-up,                     |
| 39 |                 |     | including list of any outcome data to be collected for participants who            |
| 40 |                 |     | discontinue or deviate from intervention protocols <a href="#">page 11-12</a>      |
| 41 |                 |     |                                                                                    |
| 42 | Data            | 19  | Plans for data entry, coding, security, and storage, including any                 |
| 43 | management      |     | related processes to promote data quality (eg, double data entry;                  |
| 44 |                 |     | range checks for data values). Reference to where details of data                  |
| 45 |                 |     | management procedures can be found, if not in the protocol <a href="#">page 14</a> |
| 46 |                 |     |                                                                                    |
| 47 |                 |     |                                                                                    |
| 48 | Statistical     | 20a | Statistical methods for analysing primary and secondary outcomes.                  |
| 49 | methods         |     | Reference to where other details of the statistical analysis plan can be           |
| 50 |                 |     | found, if not in the protocol <a href="#">page 10</a>                              |
| 51 |                 |     |                                                                                    |
| 52 |                 | 20b | Methods for any additional analyses (eg, subgroup and adjusted                     |
| 53 |                 |     | analyses) <a href="#">page 10</a>                                                  |
| 54 |                 |     |                                                                                    |
| 55 |                 | 20c | Definition of analysis population relating to protocol non-adherence               |
| 56 |                 |     | (eg, as randomised analysis), and any statistical methods to handle                |
| 57 |                 |     | missing data (eg, multiple imputation) <a href="#">page 10</a>                     |
| 58 |                 |     |                                                                                    |
| 59 |                 |     |                                                                                    |
| 60 |                 |     |                                                                                    |

## Methods: Monitoring

|                 |     |                                                                                                                                                                                                                                                                                                                                                                        |
|-----------------|-----|------------------------------------------------------------------------------------------------------------------------------------------------------------------------------------------------------------------------------------------------------------------------------------------------------------------------------------------------------------------------|
| Data monitoring | 21a | Composition of data monitoring committee (DMC); summary of its role and reporting structure; statement of whether it is independent from the sponsor and competing interests; and reference to where further details about its charter can be found, if not in the protocol. Alternatively, an explanation of why a DMC is not needed <a href="#">page 11 &amp; 13</a> |
|                 | 21b | Description of any interim analyses and stopping guidelines, including who will have access to these interim results and make the final decision to terminate the trial <a href="#">page 13</a>                                                                                                                                                                        |
| Harms           | 22  | Plans for collecting, assessing, reporting, and managing solicited and spontaneously reported adverse events and other unintended effects of trial interventions or trial conduct <a href="#">page 13</a>                                                                                                                                                              |
| Auditing        | 23  | Frequency and procedures for auditing trial conduct, if any, and whether the process will be independent from investigators and the sponsor <a href="#">page 13</a>                                                                                                                                                                                                    |

## Ethics and dissemination

|                               |     |                                                                                                                                                                                                                                                          |
|-------------------------------|-----|----------------------------------------------------------------------------------------------------------------------------------------------------------------------------------------------------------------------------------------------------------|
| Research ethics approval      | 24  | Plans for seeking research ethics committee/institutional review board (REC/IRB) approval <a href="#">already done page 14</a>                                                                                                                           |
| Protocol amendments           | 25  | Plans for communicating important protocol modifications (eg, changes to eligibility criteria, outcomes, analyses) to relevant parties (eg, investigators, REC/IRBs, trial participants, trial registries, journals, regulators) <a href="#">page 14</a> |
| Consent or assent             | 26a | Who will obtain informed consent or assent from potential trial participants or authorised surrogates, and how (see Item 32) <a href="#">page 7</a>                                                                                                      |
|                               | 26b | Additional consent provisions for collection and use of participant data and biological specimens in ancillary studies, if applicable <a href="#">NA</a>                                                                                                 |
| Confidentiality               | 27  | How personal information about potential and enrolled participants will be collected, shared, and maintained in order to protect confidentiality before, during, and after the trial <a href="#">page 14</a>                                             |
| Declaration of interests      | 28  | Financial and other competing interests for principal investigators for the overall trial and each study site <a href="#">page 16</a>                                                                                                                    |
| Access to data                | 29  | Statement of who will have access to the final trial dataset, and disclosure of contractual agreements that limit such access for investigators <a href="#">page 14-15</a>                                                                               |
| Ancillary and post-trial care | 30  | Provisions, if any, for ancillary and post-trial care, and for compensation to those who suffer harm from trial participation <a href="#">NA</a>                                                                                                         |

- 1  
2  
3  
4  
5  
6  
7  
8  
9  
10  
11  
12  
13  
14  
15
- |                         |     |                                                                                                                                                                                                                                                                                                                   |
|-------------------------|-----|-------------------------------------------------------------------------------------------------------------------------------------------------------------------------------------------------------------------------------------------------------------------------------------------------------------------|
| Dissemination<br>policy | 31a | Plans for investigators and sponsor to communicate trial results to participants, healthcare professionals, the public, and other relevant groups (eg, via publication, reporting in results databases, or other data sharing arrangements), including any publication restrictions<br><a href="#">page 14-15</a> |
|                         | 31b | Authorship eligibility guidelines and any intended use of professional writers <a href="#">page 14-15</a>                                                                                                                                                                                                         |
|                         | 31c | Plans, if any, for granting public access to the full protocol, participant-level dataset, and statistical code                                                                                                                                                                                                   |

## 16 Appendices

- 17  
18  
19  
20  
21  
22  
23  
24
- |                               |    |                                                                                                                                                                                                |
|-------------------------------|----|------------------------------------------------------------------------------------------------------------------------------------------------------------------------------------------------|
| Informed consent<br>materials | 32 | Model consent form and other related documentation given to participants and authorised surrogates                                                                                             |
| Biological<br>specimens       | 33 | Plans for collection, laboratory evaluation, and storage of biological specimens for genetic or molecular analysis in the current trial and for future use in ancillary studies, if applicable |

---

25 \*It is strongly recommended that this checklist be read in conjunction with the SPIRIT 2013  
26 Explanation & Elaboration for important clarification on the items. Amendments to the  
27 protocol should be tracked and dated. The SPIRIT checklist is copyrighted by the SPIRIT  
28 Group under the Creative Commons "[Attribution-NonCommercial-NoDerivs 3.0 Unported](#)"  
29 license.  
30  
31  
32  
33  
34  
35  
36  
37  
38  
39  
40  
41  
42  
43  
44  
45  
46  
47  
48  
49  
50  
51  
52  
53  
54  
55  
56  
57  
58  
59  
60



# BMJ Open

## GASS Trial study protocol: a multicentre, single-blind, randomised clinical trial comparing general anaesthesia and sedation during intra-arterial treatment for stroke.

|                                 |                                                                                                                                                                                                                                                                                                                                                                                                                                                                                                                                                                                                                                                                                                                                                                                                                                                                                     |
|---------------------------------|-------------------------------------------------------------------------------------------------------------------------------------------------------------------------------------------------------------------------------------------------------------------------------------------------------------------------------------------------------------------------------------------------------------------------------------------------------------------------------------------------------------------------------------------------------------------------------------------------------------------------------------------------------------------------------------------------------------------------------------------------------------------------------------------------------------------------------------------------------------------------------------|
| Journal:                        | <i>BMJ Open</i>                                                                                                                                                                                                                                                                                                                                                                                                                                                                                                                                                                                                                                                                                                                                                                                                                                                                     |
| Manuscript ID                   | bmjopen-2018-024249.R2                                                                                                                                                                                                                                                                                                                                                                                                                                                                                                                                                                                                                                                                                                                                                                                                                                                              |
| Article Type:                   | Protocol                                                                                                                                                                                                                                                                                                                                                                                                                                                                                                                                                                                                                                                                                                                                                                                                                                                                            |
| Date Submitted by the Author:   | 08-Feb-2019                                                                                                                                                                                                                                                                                                                                                                                                                                                                                                                                                                                                                                                                                                                                                                                                                                                                         |
| Complete List of Authors:       | Maurice, Axelle; CHU Rennes, Pôle Anesthésie et Réanimation, Inserm, NuMeCan, CIC 1414 and Université de Rennes 1<br>Ferré, Jean-Christophe; CHU Rennes, Department of Neuroradiology<br>Ronzière, Thomas; CHU Rennes, Department of Neurology<br>Devys, Jean-Michel; Service d'Anesthésie-Réanimation, Fondation Ophtalmologique Adolphe de Rothschild 25, rue Manin, F-75019 Paris, France<br>Subileau, Aurelie; Service d'anesthésie réanimation, CHRU La Cavale Blanche, Boulevard T.Prigent, F-29200 Brest, france<br>Laffon, Marc; Service d'anesthésie réanimation 1 , CHU hôpital Bretonneau, 2 boulevard Tonnellé, F-37044 Tours, France<br>Laviolle, Bruno; CHU Rennes, Clinical Pharmacology department and Inserm CIC 1414, Université de Rennes 1<br>beloel, helene; CHU Rennes, Pôle Anesthésie et Réanimation, Inserm, NuMeCan, CIC 1414 and Université de Rennes 1, |
| <b>Primary Subject Heading</b>: | Anaesthesia                                                                                                                                                                                                                                                                                                                                                                                                                                                                                                                                                                                                                                                                                                                                                                                                                                                                         |
| Secondary Subject Heading:      | Neurology, Radiology and imaging                                                                                                                                                                                                                                                                                                                                                                                                                                                                                                                                                                                                                                                                                                                                                                                                                                                    |
| Keywords:                       | Stroke < NEUROLOGY, endovascular therapy, Anaesthesia in neurology < ANAESTHETICS, Adult anaesthesia < ANAESTHETICS, Neurology < INTERNAL MEDICINE, RADIOLOGY & IMAGING                                                                                                                                                                                                                                                                                                                                                                                                                                                                                                                                                                                                                                                                                                             |
|                                 |                                                                                                                                                                                                                                                                                                                                                                                                                                                                                                                                                                                                                                                                                                                                                                                                                                                                                     |

SCHOLARONE™  
Manuscripts

1  
2  
3 1 **Title:** GASS Trial study protocol: a multicentre, single-blind, randomised clinical trial comparing  
4  
5 2 general anaesthesia and sedation during intra-arterial treatment for stroke.  
6  
7 3

8  
9 4 **Authors:** Axelle Maurice<sup>1</sup>, Jean-Christophe Ferré<sup>2</sup>, Thomas Ronziere<sup>3</sup>, Jean-Michel Devys  
10  
11 5 <sup>4</sup>, Aurelie Subileau<sup>5</sup>, Marc Laffon<sup>6</sup>, Bruno Laviolle<sup>7</sup>, Helene Beloeil<sup>1</sup>, on behalf of the SFAR  
12  
13 6 research network  
14  
15 7

16  
17  
18 8 **Authors' affiliations**

19  
20 9 <sup>1</sup> Univ Rennes, CHU Rennes, Inserm, CIC 1414 NuMeCan, Pôle Anesthésie et Réanimation,  
21  
22 10 F-35033 Rennes, France

23  
24 11 <sup>2</sup> CHU Rennes, department of Neuroradiology, F-35033 Rennes, France

25  
26 12 <sup>3</sup> CHU Rennes, Service de neurologie, F-35033 Rennes, France

27  
28 13 <sup>4</sup> Service d'Anesthésie-Réanimation, Fondation Ophtalmologique Adolphe de Rothschild  
29  
30 14 25, rue Manin, F-75019 Paris, France

31  
32 15 <sup>5</sup> Service d'anesthésie réanimation, CHRU La Cavale Blanche, Boulevard T.Prigent, F-29200  
33  
34 16 Brest, france

35  
36 17 <sup>6</sup> Service d'anesthésie réanimation 1 , CHU hôpital Bretonneau, 2 boulevard Tonnellé, F-  
37  
38 18 37044 Tours, France

39  
40 19 <sup>7</sup> Univ Rennes, CHU Rennes, Inserm, CIC 1414 (Centre d'Investigation Clinique de Rennes),  
41  
42 20 F-35000 Rennes, France  
43  
44 21

45  
46 22  
47  
48 23 **Address for correspondence:** Helene Beloeil, Pole Anesthésie-Réanimation Medecine  
49  
50 24 Interne Geriatrie, CHU Rennes, 2 avenue Henri Le Guilloux, 35033 Rennes Cedex, France.

51  
52 25 Email: [helene.beloeil@chu-rennes.fr](mailto:helene.beloeil@chu-rennes.fr)  
53  
54 26  
55  
56 27  
57  
58 28  
59  
60

1  
2  
3 **29 ABSTRACT**  
4

5 **30 Introduction:** Treatment of acute stroke has drastically changed in the last 10 years.  
6  
7 **31** Endovascular therapy is now the standard of care for patients with a stroke caused by a large  
8  
9 **32** vessel occlusion in the anterior circulation. The impact of the type of anaesthesia (general  
10  
11 **33** anaesthesia or conscious sedation) during endovascular therapy on the outcome of the  
12  
13 **34** patients is still a matter of debate. Previous studies are mostly retrospective and/or focused on  
14  
15 **35** the early post-procedure outcome and/or without blood pressure goals and/or single-centre  
16  
17 **36** small size studies. We therefore designed a multicentre study hypothesizing that conscious  
18  
19 **37** sedation is associated with a better functional outcome 3 months after endovascular therapy  
20  
21 **38** for the treatment of stroke compared with general anaesthesia.  
22  
23

24  
25  
26 **40 Methods/analysis:** The GASS trial is a randomised, parallel, single-blind, multicentre study of  
27  
28 **41** 350 patients undergoing endovascular therapy for the treatment of stroke. Patients will be  
29  
30 **42** randomly allocated to receive either a general anaesthesia or a conscious sedation. The  
31  
32 **43** primary outcome measure is the modified Rankin score assessed 3 months after the treatment.  
33  
34 **44** Data will be analysed on the intention-to-treat principle.  
35  
36

37 **45**  
38  
39 **46 Ethics/dissemination:** The GASS trial has been approved by an independent ethics  
40  
41 **47** committee for all study centres. Participant recruitment begins in September 2016. Results will  
42  
43 **48** be published in international peer-reviewed medical journals.  
44  
45

46  
47 **50 Trial registration number:** The trial is registered at ClinicalTrials.gov (Identifier: NCT  
48  
49 **51** 02822144)  
50  
51  
52  
53  
54  
55  
56  
57  
58  
59  
60

1  
2  
3 52 **Strengths and limitations of this study**  
4

- 5 53 • GASS trial is a randomised, parallel, single-blind, multicentre study comparing the effects  
6  
7 54 of general anaesthesia and conscious sedation during endovascular therapy for stroke.  
8  
9 55 • GASS trial is focused on the functional outcome of the patients 3 months after the  
10  
11 56 treatment.  
12  
13 57 • The multicentre design, broad inclusion criteria, large sample size (350 patients) and  
14  
15 58 follow-up will support external validity.  
16  
17 59 • The study does not include a systemic CT-scan after the endovascular treatment.  
18  
19 60 • The sizing of the stroke is also not part of the study as it is newly implemented technology.  
20  
21  
22  
23  
24  
25  
26  
27  
28  
29  
30  
31  
32  
33  
34  
35  
36  
37  
38  
39  
40  
41  
42  
43  
44  
45  
46  
47  
48  
49  
50  
51  
52  
53  
54  
55  
56  
57  
58  
59  
60

## 62 INTRODUCTION

63 The treatment of acute stroke has been recently transformed with the publication of RCTs  
64 showing the benefit of endovascular therapy when compare with the medical treatment in  
65 terms of functional outcome (1-4). Endovascular therapy in addition to the medical treatment  
66 is now the standard of care for selected patients who had a stroke caused by a large vessel  
67 occlusion in the anterior circulation. All studies have highlighted that the rapidity of the  
68 treatment is an essential factor for a good outcome. The other important factor is the  
69 haemodynamic conditions during the procedure because instability can worsen the clinical  
70 outcome (5,6). A retrospective study concluded that a change of even 10% in mean arterial  
71 pressure almost quadrupled the risk for poor outcomes (7).

72 In this context, the best anaesthetic strategy during the endovascular treatment has not been  
73 yet defined. Indeed, the choice between general anaesthesia (GA) and conscious sedation  
74 (CS) remains unclear. While allowing immobility, cerebral protection and airway control, GA  
75 can delay the endovascular treatment. On the other hand, CS is more rapid, allows  
76 neurological assessment during the procedure but the thrombectomy can be more difficult for  
77 the neuroradiologist because of patients' movements. In terms of haemodynamic stability,  
78 retrospective studies reported results favouring CS (8-10). However, these studies did not  
79 focus on the anaesthetic protocol and the intra-procedure haemodynamic. Anaesthetic  
80 protocols were not standardized. The first randomized controlled trial (RCT) on the subject was  
81 published in 2016 (11). This monocentric study did not find any benefit of CS over GA in terms  
82 of outcome 24 hours and 3 months after the treatment. However, functional outcome at 3  
83 months was only a secondary outcome and the anaesthesia protocol was not detailed.  
84 Moreover, the design allowed patients in the CS group to receive analgesics and/or sedatives  
85 if necessary, which could then transform a CS into a light GA. Löwhagen et al (12) did also not  
86 show any difference between the two anaesthetic technics using a well-described anaesthesia  
87 protocol. However, the study included only 90 patients and was monocentric. The most recent  
88 study (13) using an identical design with infarct growth as the primary endpoint reported no  
89 differences between CS and GA. Clinical outcome at 90 days, tested as a secondary endpoint,

1  
2  
3 90 was better in the GA group. Finally, a meta-analysis analysing the pooled data of 7 trials (14)  
4  
5 91 reported that worse outcomes at 3 months were associated with GA. However, the choice to  
6  
7 92 treat a patient with or without GA was not randomized in the trials included in this meta-analysis  
8  
9 93 (14).

10  
11 94 So far, few studies has assessed the clinical outcome 3 months after the stroke treatment  
12  
13 95 comparing GA and CS using standardized anaesthetic protocols and tight haemodynamic  
14  
15 96 control. Indeed, in previous studies (11,12,13), the anaesthesia protocol was either not  
16  
17 97 standardized or the doses not given, the blood pressure was controlled with vasoactives drugs  
18  
19 98 as different as dopamine and norepinephrine in the same study and the clinical outcome 3  
20  
21 99 months after the stroke was not the primary objective of one study (13). The recently published  
22  
23 100 post hoc analysis of the Siesta trial (15) and the GOLIATH trial (16) reported no association  
24  
25 101 between heamodynamic variations and NIHSS change after 24 hours.”

26  
27 102 Therefore, we designed a RCT comparing GA and CS during endovascular treatment for acute  
28  
29 103 stroke. Both GA and CS protocols will be standardized and the control of arterial blood  
30  
31 104 pressure too. We hypothesized that CS will be associated with a better clinical outcome  
32  
33 105 measured with the modified Rankin score (mRS) 3 months after the procedure. The Gass  
34  
35 106 study is the first multicentric RCT including a detailed anaesthesia protocol with a tight  
36  
37 107 haemodynamic control, comparing GA and CS during EVT and evaluating the functional  
38  
39 108 outcome at 3 months.

40  
41  
42  
43 109  
44  
45  
46  
47  
48  
49  
50  
51  
52  
53  
54  
55  
56  
57  
58  
59  
60

## 110 **METHODS AND ANALYSIS**

### 111 **Trial design**

112 The GASS study is an investigator initiated, national, multicentre, randomised, simple-blind,  
113 parallel-group clinical trial with concealed allocation of patients scheduled to undergo  
114 endovascular therapy for stroke 1:1 to receive either a general anaesthesia protocol or a  
115 conscious sedation protocol. The trial will be conducted in four university and non-university  
116 centres. It started in September 2016 and will continue for a total of 36 months.

### 118 **Participant eligibility and consent**

119 Trial site investigators will identify consecutive eligible patients from the listed criteria. Eligible  
120 patients or a family member when appropriate will receive written and oral information and will  
121 be included after investigators have obtained informed written consent.

#### 123 Inclusion criteria

- 124 1. Adult (18 years or older) patients admitted to the participating centre
- 125 2. Occlusion of a large vessel in the anterior cerebral circulation
- 126 3. Undergoing endovascular therapy for stroke
- 127 4. Benefiting from the health insurance system
- 128 5. Signed informed consent from the patient or their legally next of kin

#### 129 Non-inclusion criteria

- 130 1. Pregnant or breast-feeding women
- 131 2. Patients already intubated and mechanical ventilated before inclusion in the study
- 132 3. Intracerebral haemorrhage associated with the ischemic stroke
- 133 4. Contra-indications to conscious sedation: Glasgow coma scale inferior to 8, agitation  
134 not allowing the patient to stay still during the procedure, deglutition disorders
- 135 5. Contra-indications to succinylcholine: hyperkalaemia, allergy
- 136 6. Body mass index superior to 35kg/m<sup>2</sup>
- 137 7. Allergy to one of the anaesthetic drugs

- 1  
2  
3 138 8. Uncontrolled hypotension,  
4  
5 139 9. Life-threatening comorbidity  
6  
7 140 10. Adults legally protected (under judicial protection, guardianship, or supervision),  
8  
9 141 persons deprived of their liberty  
10  
11 142 11. patients who could not walk prior stroke  
12  
13 143

#### 144 **Allocation and blinding**

145 Patients will be randomised in two groups (general anaesthesia group and conscious sedation  
146 group). Randomisation will be done by investigators as close as possible to the endovascular  
147 therapy. Each patient will be given a unique randomisation number (patient code).  
148 Randomization will be stratified on the centre, the National Institute of Health Stroke Score  
149 (NIHSS  $\leq$  or  $>$  14) and the administration or not of IV thrombolysis. The primary evaluation  
150 criterion will be assessed blinded to the randomisation group. During the study period, outcome  
151 assessors will be kept blind to the randomisation group. Research nurses evaluating the  
152 outcomes 3 months after the treatment will not participate to the anaesthesia and will not be  
153 aware of the randomisation group. They will be blind to the treatment. The anaesthesiologist,  
154 the nurse anaesthesiologist, the neuroradiologist and the neurologist will not be blinded. They  
155 will not participate in the assessment of the patients at any time.  
156 At each participating centre, data will be collected and entered into the electronic web-based  
157 case report form (eCRF) by trial or clinical trained personal (clinical research associate),  
158 blinded to the allocation group, under the supervision of the trial site investigators.

159

#### 160 **Interventions**

161 All included patients will be allocated to one of the following two study groups:

- 162 • **General anaesthesia group:** patients will receive a standardised anaesthesia protocol  
163 with remifentanyl
- 164 • **Conscious sedation group:** patients will receive a standard conscious sedation with  
165 remifentanyl



1  
2  
3 166  
4  
5 167 *Standardized general anaesthesia will include:* Induction: Etomidate (0.25 – 0.4 mg/kg) and  
6  
7 168 succinylcholine (1 mg/kg) and maintenance: TCI propofol (maximum target: 4 microg/ml), TCI  
8  
9 169 remifentanil (0.5-4 ng/ml) and curares as needed.

10  
11 170 *Standardized conscious sedation will include:* TCI remifentanil (maximum target 2 ng/ml), local  
12  
13 171 anaesthesia with lidocaine 10 mg/ml (maximum 10 ml). Oxygen will be administered only if  
14  
15 172  $SPO_2 \leq 96\%$ . Respiratory rate and capnography will be monitored.

16  
17  
18 173 Conscious sedation can be converted into a general anaesthesia in the following situations:

- 19  
20 174
- 21 175 • Agitation or restlessness not allowing the endovascular therapy
  - 22 176 • Vomiting not allowing the endovascular therapy
  - 23 177 • Glasgow coma scale  $< 8$  and /or deglutition disorders
  - 24 178 • Severe hypoxemia with  $SPO_2 < 96\%$  with oxygen delivered with a high concentration  
25 179 mask (10 l/min maximum)
  - 26 178 • Respiratory depression with respiratory rate  $> 35$  /min and/or clinical signs of  
27 179 respiratory exhaustion
- 28 179  
29 180  
30 181

31 181  
32  
33 182 In both groups:

34  
35 183 intraoperative dose changes will be left to the anaesthesiologist in charge of the patient if  
36  
37 184 necessary, IV norepinephrine will be administered in order to maintain blood pressure (BP)  
38  
39 185 within the recommended range: systolic blood pressure (SBP) between 140 and 185 mmHg;  
40  
41 186 diastolic blood pressure (DBP)  $< 110$  mmHg. A drop of more than 25% of the mean blood  
42  
43 187 pressure (MBP) will also be avoided. Blood pressure will be continuously non invasively  
44  
45 188 monitored. Norepinephrine will be administered in a dedicated intravenous line and diluted at  
46  
47 189 250 microg/ml. Hyperglycemia will be treated with IV insuline when necessary (target 11  
48  
49 190 mmol/L).

50  
51  
52 191 A systematic immediate post-EVT Cone-beal CT scan will be performed for all patients.

53  
54 192 Decisions about all other aspects of patient care will be performed according to the expertise  
55  
56 193 of the staff at each centre and to routine clinical practice to minimize interference with the trial  
57  
58 194 intervention. Postoperative blood pressure targets are defined as follows: SBP  $< 180$  mmHg

1  
2  
3 195 DBP < 110 mmHg and MBP > 65 mmHg. In case of TICI 2a or lower, the objective is MBP >  
4  
5 196 75 mmHg. Norepinephrine will be used if necessary. Three months after the thrombectomy,  
6  
7 197 patients will consult with a neurologist.  
8

9 198

## 11 199 **Outcome measures**

### 13 200 Primary outcome measure

15 201 The primary outcome measure will be the neurological outcome assessed with the modified  
16  
17 202 Rankin score 3 months (17) after the endovascular therapy. Success will be considered as a  
18  
19 203 modified Rankin score  $\leq 2$ . The modified Rankin score (mRS) will be assessed by trained  
20  
21 204 research nurse blinded to the randomisation group.  
22  
23

24 205 An additional exploratory analysis of the primary endpoint will be performed to assess  
25  
26 206 treatments effects according to baseline NIHSS ( $\leq$  or  $>$  14) and the administration or not of IV  
27  
28 207 thrombolysis.  
29

30 208

### 32 209 Secondary outcomes measures

- 34 210 • Time between the beginning of the clinical symptoms and the last angiography
- 35  
36 211 • Time between the arrival of the patient at the stroke center and the beginning of the  
37  
38 212 endovascular therapy (time of puncture)
- 39  
40 213 • Quality of the recanalization after the endovascular treatment evaluated by the  
41  
42 214 neuroradiologist (not blinded). A good quality recanalization corresponds to a 2b or 3  
43  
44 215 modified treatment in cerebral ischemia scale (mTICI) (18)
- 45  
46 216 • NIHSS score at Day 1 (day after the endovascular treatment) and Day 7 (or the day  
47  
48 217 the patient leaves the hospital if scheduled before D7) (19)
- 49  
50 218 • Complications during the procedure (dissection, rupture of the artery, thrombus in  
51  
52 219 another territory)
- 53  
54 220 • Mortality rate 3 months after the endovascular treatment
- 55  
56 221 • Number of hypo- or hypertension events during the procedure and the first 24 hours  
57  
58  
59  
60

1  
2  
3 222 after the procedure (hypotension defined as SBP < 140 mmHg or a drop of the MBP of  
4  
5 223 40% or more, hypertension defined as SBP > 185 mmHg or DBP > 110 mmHg)

- 6  
7 224
- Number of patients who received norepinephrine
- 8  
9 225
- Number of conversion of conscious sedation to general anaesthesia
- 10  
11 226

## 12 227 **Statistical analysis**

13  
14  
15 228 Statistical analysis will be performed on all randomized and evaluated patients (intention to  
16  
17 229 treat analysis). It will be performed with SAS software (SAS Institute, Cary, NC, USA) in the  
18  
19 230 Methodology/Biometrics department of the Inserm 1414 Clinical Investigation Centre of  
20  
21 231 Rennes. A first overall descriptive analysis and analysis by group will be performed. This  
22  
23 232 consists of separate estimates, numbers and percentages for qualitative variables, means,  
24  
25 233 standard error, medians and interquartile intervals for quantitative variables. The normal  
26  
27 234 feature of the distribution of quantitative variables will be checked. Student's t test or a Mann-  
28  
29 235 Whitney test if necessary will be used to compare quantitative variables, and a Chi<sup>2</sup> or Fisher's  
30  
31 236 exact test if necessary will be used to compare qualitative variables between two groups at  
32  
33 237 inclusion. The primary endpoint will be compared between the two groups with the Chi<sup>2</sup> test.  
34  
35 238 Two interim analyses after inclusion of 1/3 and 2/3 of the patients, and one final analysis are  
36  
37 239 planned. Stopping rules will use the alpha spending function with the O'Brien-Fleming  
38  
39 240 boundary. The cumulative values of alpha for each analysis are: 0.00021 at the first analysis,  
40  
41 241 0.01202 at the second analysis and 0.04626 at the final analysis (nTerim, V1.1, Statistical  
42  
43 242 solutions Ltd, Cork, Ireland). The trial will be stopped early if the significance of the Chi<sup>2</sup> test is  
44  
45 243 below these alpha values. For the analysis of the other endpoints, the same strategy as for  
46  
47 244 baseline comparisons will be used. Continuous endpoints repeatedly measured during the  
48  
49 245 study will be compared using a repeated measure two-way (time, group) analysis of variance.  
50  
51 246 For all these analyses, adjustments can be made in case of heterogeneity at inclusion. Except  
52  
53 247 for the interim analyses, a p value <0.05 will be considered as significant for all analyses.  
54  
55 248

## 56 249 **Missing values**

1  
2  
3 250 Missing data will not be replaced. Mixed models can be used in analysis of repeated data to  
4  
5 251 avoid deleting subjects with any missing values.  
6

7 252

8  
9 253 **Sample size estimation**

10  
11 254 A previous study reported 30% of the patients with a mRS score  $\leq 2$  after endovascular therapy  
12  
13 255 under general anaesthesia (20). We aim to show an increase of patients with a good prognostic  
14  
15 256 (defined as mRS  $\leq 2$ ) up to 45% after endovascular treatment under conscious sedation.  
16  
17 257 Therefore, 166 patients per group will be needed to have 80% power, at a two-sided alpha  
18  
19 258 level of 0.05. A total of 350 patients will be included to take into account non-evaluable patients  
20  
21 259 and drop outs.  
22  
23

24 260

25  
26 261 **Data Registration**

27  
28 262 Data will be entered into the web- based electronic case report form (eCRF) by trial or clinical  
29  
30 263 personnel under the supervision of the trial site investigators at each participating centre. From  
31  
32 264 the eCRF the trial database will be established. Data collection will be monitored by trained  
33  
34 265 research coordinators.  
35  
36

37 266

38  
39 267 The following data will be registered:

40  
41 268 Baseline characteristics at randomisation:

42  
43 269 Demographic data (age, height, weight, gender and body mass index); American Society of  
44  
45 270 Anaesthesiologists (ASA) physical status; significant comorbidities (cardio-vascular,  
46  
47 271 respiratory, neurologic , psychiatric and /or abdominal disease, cancer, preoperative  
48  
49 272 chemotherapy or radiotherapy), NIHSS score, time of arrival at the hospital, time of the  
50  
51 273 beginning of the symptoms, time of the cerebral angiography or MRI (meaning time of first  
52  
53 274 image for diagnosis) , time between the first contact of the patient with the anaesthesiologist  
54  
55 275 and the induction of anaesthesia (GA or CS),localisation of the stroke, IV fibrinolysis if  
56  
57 276 applicable, creatinine clearance, haemostasis (PT and ACT if available).  
58

59  
60 277 Intraoperative data:

1  
2  
3 278 Time of arterial puncture, time of recanalization, mTICI score (16), doses of norepinephrine,  
4  
5 279 intraoperative complications (hypotension defined as SBP < 140 mmHg or a drop of the MBP  
6  
7 280 of 40% or more, hypertension defined as SBP> 185 mmHg or DBP > 110 mmHg) necessity to  
8  
9 281 convert the conscious sedation onto a general anaesthesia, duration of anaesthesia and  
10  
11 282 procedure, procedure related complications (distal embolization in a different territory,  
12  
13 283 intramural arterial dissection, arterial perforation, access-site complications leading to surgery).  
14  
15  
16 284

17  
18 285 Postoperative data:

19  
20 286 The following data will be collected:

- 21  
22 287 • Duration of invasive ventilation  
23  
24 288 • NIHSS day 1 and Day 7 or the day the patient leaves the hospital if before Day 7  
25  
26 289 • Necessity of noradrenaline during the first 2 hours after the endovascular treatment  
27  
28 290 • Hypo- or hypertension events as defined above during first 24 hours  
29  
30 291 • Bradycardie with atropine treatment during first 24 hours  
31  
32 292 • Hospitalization in intensive care unit  
33  
34 293 • Number of hours of invasive ventilation  
35  
36 294 • Pneumonia  
37  
38 295 • Death until the final call for mRS (3 months after the procedure)  
39  
40 296 • mRS 3 months after the procedure during a telephone interview (21).  
41  
42  
43  
44 297

45  
46 298 **Patient withdrawal**

47  
48 299 A participant who no longer agrees to participate in the clinical trial can withdraw the informed  
49  
50 300 consent at any time without need of further explanation. Participants who will withdraw from  
51  
52 301 the study will be followed up, according to routine clinical practice in each participating centre.  
53  
54 302 In order to conduct intention-to-treat analyses with as little missing data as possible, the  
55  
56 303 investigator may ask the participant which aspects of the trial he/she wishes to withdraw from  
57  
58 304 (participation in the remaining follow-up assessments, use of already collected data).  
59  
60

1  
2  
3 305 Whenever possible, the participant will be asked for permission to obtain data for the primary  
4  
5 306 outcome measure. All randomised patients will be reported, and all data available with consent  
6  
7 307 will be used in the analyses. If appropriate, missing data will be handled in accordance with  
8  
9 308 multiple imputation procedures if missing data are greater than 5%.

10  
11 309

### 12 310 **Safety**

13  
14  
15 311 Every serious adverse event related to the studied treatment or not, expected or unexpected,  
16  
17 312 will be reported within 24 hours by the investigator to the sponsor on a "Serious adverse event"  
18  
19 313 form on which will be indicated the date of occurrence, criterion of severity, intensity,  
20  
21 314 relationship with the treatment (or the study) evaluated, and the outcome. The period in which  
22  
23 315 serious adverse events should be reported begins from the day of the written informed consent  
24  
25 316 to the end of the follow-up (day of the evaluation of mRS 3 to 4 months after the procedure).  
26  
27 317 Whenever a serious adverse event persists at the end of the study, the investigator will follow  
28  
29 318 the patient until the event is considered resolved. The following events: hypo- or hypertension  
30  
31 319 will be recorded as study endpoints criterion in the case report form. In order to avoid collection  
32  
33 320 duplication, they will not be reported on the "adverse event" page of the case report form. As  
34  
35 321 planned in the study, they will be analysed at the time of interim analyses (two interim analyses  
36  
37 322 after inclusion of 1/3 and 2/3 of the patients) which will permit to show potential difference  
38  
39 323 between the two groups during the study.

40  
41  
42 324 In addition, serious adverse events will be submitted to the data monitoring and safety  
43  
44 325 committee (DMSC). The DMSC is independent of the trial investigators and will perform an  
45  
46 326 ongoing review of safety parameters and overall study conduct. The DMSC is comprised of a  
47  
48 327 neurologist, an anaesthesiologist, a neuroradiologist, a pharmacologist and a methodologist.  
49  
50 328 The DMSC will be responsible for safeguarding the interests of trial participants, assessing the  
51  
52 329 safety and efficacy of the interventions during the trial, and for monitoring the overall conduct  
53  
54 330 of the clinical trial. To contribute to enhancing the integrity of the trial, the DMSC may also  
55  
56 331 formulate recommendations relating to the recruitment/retention of participants, their  
57  
58 332 management, improving adherence to protocol-specified regimens and retention of  
59  
60

1  
2  
3 333 participants, and the procedures for data management and quality control. Recommendations  
4  
5 334 for pausing or stopping the study will be made by the DMSC in case of serious adverse  
6  
7 335 reactions and suspected unexpected serious adverse reaction.

8  
9 336 All adverse events for which the investigator or the sponsor considers that a causal relationship  
10  
11 337 with the investigational medicinal products can be reasonably considered, will be considered  
12  
13 338 as suspected adverse reactions. If they are unexpected, they are qualified as being Suspected  
14  
15 339 Unexpected SAR (SUSAR) and will be notified in a report by the sponsor to Eudravigilance  
16  
17 340 (European pharmacovigilance database) and to local regulatory agency within the regulatory  
18  
19 341 time periods for reporting: Immediate declaration if seriousness criteria is death or life-  
20  
21 342 threatening condition, declaration within 15 days for other seriousness criteria.  
22  
23

24 343

#### 25 26 344 **Data handling and retention**

27  
28 345 Data will be handled according to French law. All original records (including consent forms,  
29  
30 346 reports of suspected unexpected serious adverse reactions and relevant correspondences)  
31  
32 347 will be archived at trial sites for 15 years. The clean trial database file will be anonymised and  
33  
34 348 maintained for 15 years.  
35

36  
37 349

#### 38 39 350 **Patient and public involvement**

40  
41 351 Patient and public were not involved in any of the phases of this study  
42

43 352

### 44 45 353 **ETHICS AND DISSEMINATION**

46  
47 354

#### 48 49 355 **Ethical and legislative approvals**

50  
51 356 GASS trial was approved by the French National Safety and Drug Agency (Agence Nationale  
52  
53 357 de Sécurité du Médicament (September 8<sup>th</sup>, 2016). By June 13<sup>th</sup>, 2016, the study has been  
54  
55 358 approved for all centres by a central ethics committee (Comité de Protection des Personnes  
56  
57 359 de Poitiers). The GASS trial is registered in the European Clinical Trials Database (EudraCT  
58  
59 360 2016-000795-25) and at ClinicalTrials.gov with the trial identification number NCT02822144.

1  
2  
3 361 Trial methods and results will be reported according to the Consolidated Standards of  
4  
5 362 Reporting Trials (CONSORT) 2010 guidelines (22).

6  
7 363

8  
9 364 **Publication plan**

10  
11 365 Scientific presentations and reports corresponding to the study will be written under the  
12  
13 366 responsibility of the coordinating investigator of the study with the agreement of the principal  
14  
15 367 investigators and the methodologist. The co-authors of the report and of publications will be  
16  
17 368 the investigators and clinicians involved, on a pro rata basis of their contribution in the study,  
18  
19 369 as well as the biostatistician and associated researchers. All trial sites will be acknowledged,  
20  
21 370 and all investigators at these sites will appear with their names under 'the GASS investigators'  
22  
23 371 in the final manuscript. Rules on publication will follow international recommendations (23).

24  
25 372

26  
27 373

28  
29 374 **Contributors:**

30  
31 375 Axelle Maurice (AM) as anesthetist contributed to the conception and design of the research  
32  
33 376 protocol and wrote the research protocol. AM wrote the first draft of the protocol. AM critically  
34  
35 377 revised and modified the protocol and the article. AM is including patients in the ongoing study  
36  
37 378 in the Rennes teaching hospital. AM approved the final version to be published.

38  
39 379 Jean-Christophe Ferré (JCF) as neuroradiologist contributed to the conception and design of  
40  
41 380 the research protocol. JCF critically revised and modified the protocol and the article. JCF  
42  
43 381 approved the final version to be published.

44  
45 382 Thomas Ronziere (TR) as neurologist contributed to the conception and design of the research  
46  
47 383 protocol. TR critically revised and modified the protocol and the article. TR approved the final  
48  
49 384 version to be published.

50  
51 385 Jean-Michel Devys (JMD) as anesthetist critically revised and modified the protocol and the  
52  
53 386 article. JMD is including patients in the ongoing study in the Fondation Rothschild hospital in  
54  
55 387 Paris. JMD approved the final version to be published.

56  
57 388



1  
2  
3 389 Aurelie Subileau (AS) as anesthetist critically revised and modified the protocol and the article.

4  
5 390 AS is including patients in the ongoing study in the Brest teaching hospital. AS approved the  
6  
7 391 final version to be published.

8  
9 392 Marc Laffon (ML) as anesthetist critically revised and modified the protocol and the article. ML  
10  
11 393 is including patients in the ongoing study in the Tours teaching hospital. ML approved the final  
12  
13 394 version to be published.

14  
15 395 Bruno Laviolle (BL) designed the study and its statistical analysis plan.

16  
17 396 Helene Beloeil (HB) provided critical input pertaining to the design of the trial interventions and  
18  
19 397 procedures. HB wrote this manuscript. HB is including patients in the ongoing study in the  
20  
21 398 Rennes teaching hospital.

22  
23  
24 399

25  
26 400 **Funding:** GASS trial is supported by funding from French Ministry of Health (Programme  
27  
28 401 Hospitalier de Recherche Clinique Inter regional (PHRCI 2015).

29  
30 402 The funding sources had no role in the trial design, trial conduct, data handling, data analysis  
31  
32 403 or writing and publication of the manuscript.

33  
34  
35 404

36  
37 405 **Sponsor:** CHU de Rennes, Direction de la recherche Clinique, 2 avenue Henri Le Guilloux,  
38  
39 406 35033 Rennes Cedex, France. The sponsor had no role in the trial design, trial conduct, data  
40  
41 407 handling, data analysis or writing and publication of the manuscript.

42  
43 408

44  
45 409

46  
47 410 **Competing interests:** None

48  
49 411

## 50 51 412 **References**

52  
53 413 1- Berkhemer OA, Fransen PS, Beumer D, van den Berg LA, Lingsma HF, et al. MR  
54  
55 414 CLEAN Investigators. A randomized trial of intra-arterial treatment for acute  
56  
57 415 ischemic stroke. N Engl J Med. 2015; 372:11-20.

58  
59  
60

- 1  
2  
3 416 2- Goyal M, Demchuk AM, Menon BK, Eesa M, Rempel JL, et al. ESCAPE Trial  
4 417 Investigators. Randomized Assessment of Rapid Endovascular Treatment of  
5 418 Ischemic Stroke. *N Engl J Med*. 2015; 372:1019-30.
- 6  
7  
8 419 3- Campbell BC, Mitchell PJ, Kleinig TJ, Dewey HM, Churilov L, and al. EXTEND-IA  
9 420 Investigators. Endovascular therapy for ischemic stroke with perfusion-imaging  
10 421 selection. *N Engl J Med*. 2015; 372:1009-18.
- 11  
12  
13 422 4- Nogueira RG, Smith WS, Sung G, et al. Effect of time to reperfusion on clinical  
14 423 outcome of anterior circulation strokes treated with thrombectomy: pooled analysis  
15 424 of the MERCI and Multi MERCI trials. *Stroke*. 2011; 42: 3144–9.
- 16  
17 425 5- Davis MJ, Menon BK, Baghirzada LB, Campos-Herrera CR, Goyal M, Hill MD,  
18 426 Archer DP; Calgary Stroke Program. Aesthetic management and outcome in  
19 427 patients during endovascular therapy for acute stroke. *Anesthesiology*.  
20 428 2012;116:396-405.
- 21  
22  
23  
24 429 6- Löwhagen Hendén P, Rentzos A, Karlsson JE, Rosengren L, Sundeman H,  
25 430 Reinsfelt B, Ricksten SE. Hypotension During Endovascular Treatment of Ischemic  
26 431 Stroke Is a Risk Factor for Poor Neurological Outcome. *Stroke*. 2015; 46:2678-2680.
- 27  
28  
29 432 7- Whalin MK, Halenda KM, Haussen DC, Rebello LC, Frankel MR, Gershon RY,  
30 433 Nogueira RG. Even Small Decreases in Blood Pressure during Conscious Sedation  
31 434 Affect Clinical Outcome after Stroke Thrombectomy: An Analysis of Hemodynamic  
32 435 Thresholds. *AJNR Am J Neuroradiol*. 2017;38:294-298.
- 33  
34  
35 436 8- Berkhemer OA, van den Berg LA, Fransen PS, Beumer D, Yoo AJ, Lingsma HF,  
36 437 Schonewille WJ, van den Berg R, Wermer MJ, Boiten J, Lycklama À Nijeholt GJ,  
37 438 Nederkoorn PJ, Hollmann MW, van Zwam WH, van der Lugt A, van Oostenbrugge  
38 439 RJ, Majoie CB, Dippel DW, Roos YB; MR CLEAN investigators. The effect of  
39 440 anaesthetic management during intra-arterial therapy for acute stroke in MR  
40 441 CLEAN. *Neurology*. 2016 ;87:656-64.
- 41  
42  
43  
44  
45 442 9- Abou-Chebl A, Yeatts SD, Yan B, Cockroft K, Goyal M, Jovin T, Khatri P, Meyers  
46 443 P, Spilker J, Sugg R, Wartenberg KE, Tomsick T, Broderick J, Hill MD. Impact of  
47 444 General Anesthesia on Safety and Outcomes in the Endovascular Arm of  
48 445 interventional Management of Stroke (IMS) III Trial. *Stroke*. 2015;46:2142-8.
- 49  
50  
51 446 10- Bekelis K, Missios S, MacKenzie TA, Tjoumakaris S, Jabbour P. Anesthesia  
52 447 Technique and Outcomes of Mechanical Thrombectomy in Patients with Acute  
53 448 Ischemic Stroke. *Stroke* 2017 ;48:361-366.
- 54  
55  
56 449 11- Schönenberger S, Uhlmann L, Hacke W, Schieber S, Mundiyanapurath S,  
57 450 Purrucker JC, Nagel S, Klose C, Pfaff J, Bendszus M, Ringleb PA, Kieser M,  
58 451 Möhlenbruch MA, Bösel J. Effect of Conscious Sedation vs General Anesthesia on  
59  
60

- 1  
2  
3 452 Early Neurological Improvement Among Patients with Ischemic Stroke Undergoing  
4 453 Endovascular Thrombectomy: A Randomized Clinical Trial. JAMA.  
5 454 2016;316 :1986-1996.  
6  
7  
8 455 12- Löwhagen Henden P, Rentzos A, Karlsson JE, Rosengren L, Leiram B, et al.  
9 456 General anaesthesia versus conscious sedation for endovascular treatment of  
10 457 acute ischaemic stroke : the anstroke trial (anaesthesia during stroke). Stroke 2017 ;  
11 458 48 : 1601-1607.  
12  
13  
14 459 13- Simonsen CZ, Yoo AJ, Sørensen LH, Juul N, Johnsen SP, Andersen G,  
15 460 Rasmussen M. Effect of General Anesthesia and Conscious Sedation During  
16 461 Endovascular Therapy on Infarct Growth and Clinical Outcomes in Acute Ischemic  
17 462 Stroke: A Randomized Clinical Trial JAMA Neurol. 2018 ;75(470-477).  
18  
19  
20 463 14- Campbell BCV, van Zwam WH, Menon BK, Dippel DWJ, Demchuk AM, Bracad S  
21 464 et al. Effect of general anaesthesia on functional outcome in patients with anterior  
22 465 circulation ischaemic stroke having endovascular thrombectomy versus standard  
23 466 of care: a meta-analysis of individual patient data. Lancet neurol 2018; 17:47-53.  
24  
25  
26 467 15- Schönenberger S, Uhlmann L, Ungerer M, Pfaff J, Nagel S, Kose C, et al.  
27 468 Association of blood pressure with short-and long-term functional outcome after  
28 469 stroke thrombectomy: post hoc analysis of the siest trial. Stroke 2018; 49: 1451-  
29 470 1456.  
30  
31  
32 471 16- Rasmussen M, Espelund US, Juul N, Yoo AJ, Sorensen LH, Sorensen KE et al.  
33 472 The influence of blood pressure management on neurological outcome in  
34 473 endovascular therapy for acute ischaemic stroke. Br J Anaesth 2018; 120:1287-  
35 474 1294.  
36  
37  
38 475 17- Banks JL, Marotta CA. Outcomes Validity and Reliability of the Modified Rankin  
39 476 Scale: Implications for Stroke Clinical Trials. A Literature Review and Synthesis.  
40 477 Stroke. 2007; 38:1091-1096.  
41  
42  
43 478 18- Zaidat OO, Yoo AJ, Khatri P, Tomsick TA, von Kummer R, Saver JL, et al. Cerebral  
44 479 Angiographic Revascularization Grading (CARG) Collaborators; STIR  
45 480 Revascularization working group; STIR Thrombolysis in Cerebral Infarction (TICI)  
46 481 Task Force. Recommendations on angiographic revascularization grading  
47 482 standards for acute ischemic stroke: a consensus statement. Stroke.  
48 483 2013 ;44:2650-2663.  
49  
50  
51 484 19- Brott T, Adams HP, Olinger CP, Marler JR, Barsan WG, Biller J, SpilkerJ, Holleran  
52 485 R, Eberle R, Hertzberg V, Rorick M, Moomaw CJ, Walker M. Measurements of  
53 486 acute cerebral infarction: a clinical examination scale. Stroke. 1989; 20:864–870.  
54  
55  
56  
57  
58  
59  
60

- 1  
2  
3 487 20- Abou-Chebl A, Lin R, Hussain MS, Jovin TG, Levy EI, Liebeskind DS, et al.  
4 488 Conscious sedation versus general anaesthesia during endovascular therapy for  
5 489 acute anterior circulation stroke: preliminary results from a retrospective,  
6 490 multicentre study. *Stroke*. 2010; 41:1175-79.  
7  
8 491 21- Bruno A, Akinwuntan AE, Lin C, Close B, Davis K, Baute V et al. Simplified modified  
9 492 rankin scale questionnaire. Reproducibility over the telephone and validation with  
10 493 quality of life. *Stroke* 2011; 42:2276-9.  
11 494 22- Schulz KF, Altman DG, Moher D, et al. CONSORT 2010 statement: updated  
12 495 guidelines for reporting parallel group randomised trials. *BMJ* 2010;340:c332.  
13 496 23- International Committee of Medical Journal E. Uniform requirements for  
14 497 manuscripts submitted to biomedical journals. *The New England journal of*  
15 498 *medicine* 1997;336(4):309-15  
16 499

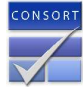

## CONSORT 2010 checklist of information to include when reporting a randomised trial\*

| Section/Topic                    | Item No | Checklist item                                                                                                                                                                              | Reported on page No |
|----------------------------------|---------|---------------------------------------------------------------------------------------------------------------------------------------------------------------------------------------------|---------------------|
| <b>Title and abstract</b>        |         |                                                                                                                                                                                             |                     |
|                                  | 1a      | Identification as a randomised trial in the title                                                                                                                                           | Page 1              |
|                                  | 1b      | Structured summary of trial design, methods, results, and conclusions (for specific guidance see CONSORT for abstracts)                                                                     | Page 2              |
| <b>Introduction</b>              |         |                                                                                                                                                                                             |                     |
| Background and objectives        | 2a      | Scientific background and explanation of rationale                                                                                                                                          | Pages 4&5           |
|                                  | 2b      | Specific objectives or hypotheses                                                                                                                                                           | Page 5              |
| <b>Methods</b>                   |         |                                                                                                                                                                                             |                     |
| Trial design                     | 3a      | Description of trial design (such as parallel, factorial) including allocation ratio                                                                                                        | Page 6              |
|                                  | 3b      | Important changes to methods after trial commencement (such as eligibility criteria), with reasons                                                                                          | NA                  |
| Participants                     | 4a      | Eligibility criteria for participants                                                                                                                                                       | Page 6              |
|                                  | 4b      | Settings and locations where the data were collected                                                                                                                                        | Page 6              |
| Interventions                    | 5       | The interventions for each group with sufficient details to allow replication, including how and when they were actually administered                                                       | Pages 7&8           |
| Outcomes                         | 6a      | Completely defined pre-specified primary and secondary outcome measures, including how and when they were assessed                                                                          | Page 9              |
|                                  | 6b      | Any changes to trial outcomes after the trial commenced, with reasons                                                                                                                       | NA                  |
| Sample size                      | 7a      | How sample size was determined                                                                                                                                                              | Page 11             |
|                                  | 7b      | When applicable, explanation of any interim analyses and stopping guidelines                                                                                                                | Page 10             |
| <b>Randomisation:</b>            |         |                                                                                                                                                                                             |                     |
| Sequence generation              | 8a      | Method used to generate the random allocation sequence                                                                                                                                      | Page 7              |
|                                  | 8b      | Type of randomisation; details of any restriction (such as blocking and block size)                                                                                                         | Page 7              |
| Allocation concealment mechanism | 9       | Mechanism used to implement the random allocation sequence (such as sequentially numbered containers), describing any steps taken to conceal the sequence until interventions were assigned | Page 7              |
| Implementation                   | 10      | Who generated the random allocation sequence, who enrolled participants, and who assigned participants to interventions                                                                     | Page 7              |
| Blinding                         | 11a     | If done, who was blinded after assignment to interventions (for example, participants, care providers, those                                                                                | Page 7              |

|                                                      |     |                                                                                                                                                   |         |
|------------------------------------------------------|-----|---------------------------------------------------------------------------------------------------------------------------------------------------|---------|
|                                                      |     | assessing outcomes) and how                                                                                                                       |         |
|                                                      | 11b | If relevant, description of the similarity of interventions                                                                                       | NA      |
| Statistical methods                                  | 12a | Statistical methods used to compare groups for primary and secondary outcomes                                                                     | Page 10 |
|                                                      | 12b | Methods for additional analyses, such as subgroup analyses and adjusted analyses                                                                  | Page 10 |
| <b>Results</b>                                       |     |                                                                                                                                                   |         |
| Participant flow (a diagram is strongly recommended) | 13a | For each group, the numbers of participants who were randomly assigned, received intended treatment, and were analysed for the primary outcome    | NA      |
|                                                      | 13b | For each group, losses and exclusions after randomisation, together with reasons                                                                  |         |
| Recruitment                                          | 14a | Dates defining the periods of recruitment and follow-up                                                                                           |         |
|                                                      | 14b | Why the trial ended or was stopped                                                                                                                |         |
| Baseline data                                        | 15  | A table showing baseline demographic and clinical characteristics for each group                                                                  |         |
| Numbers analysed                                     | 16  | For each group, number of participants (denominator) included in each analysis and whether the analysis was by original assigned groups           |         |
| Outcomes and estimation                              | 17a | For each primary and secondary outcome, results for each group, and the estimated effect size and its precision (such as 95% confidence interval) |         |
|                                                      | 17b | For binary outcomes, presentation of both absolute and relative effect sizes is recommended                                                       |         |
| Ancillary analyses                                   | 18  | Results of any other analyses performed, including subgroup analyses and adjusted analyses, distinguishing pre-specified from exploratory         |         |
| Harms                                                | 19  | All important harms or unintended effects in each group (for specific guidance see CONSORT for harms)                                             |         |
| <b>Discussion</b>                                    |     |                                                                                                                                                   |         |
| Limitations                                          | 20  | Trial limitations, addressing sources of potential bias, imprecision, and, if relevant, multiplicity of analyses                                  |         |
| Generalisability                                     | 21  | Generalisability (external validity, applicability) of the trial findings                                                                         |         |
| Interpretation                                       | 22  | Interpretation consistent with results, balancing benefits and harms, and considering other relevant evidence                                     |         |
| <b>Other information</b>                             |     |                                                                                                                                                   |         |
| Registration                                         | 23  | Registration number and name of trial registry                                                                                                    | Page 2  |
| Protocol                                             | 24  | Where the full trial protocol can be accessed, if available                                                                                       | NA      |
| Funding                                              | 25  | Sources of funding and other support (such as supply of drugs), role of funders                                                                   | Page 15 |

\*We strongly recommend reading this statement in conjunction with the CONSORT 2010 Explanation and Elaboration for important clarifications on all the items. If relevant, we also recommend reading CONSORT extensions for cluster randomised trials, non-inferiority and equivalence trials, non-pharmacological treatments, herbal interventions, and pragmatic trials. Additional extensions are forthcoming: for those and for up to date references relevant to this checklist, see [www.consort-statement.org](http://www.consort-statement.org).

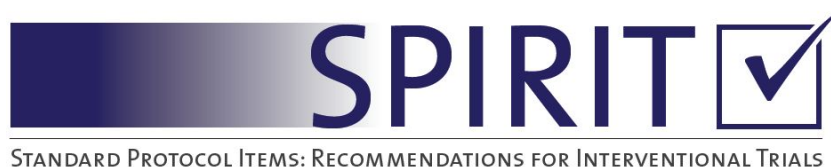

SPIRIT 2013 Checklist: Recommended items to address in a clinical trial protocol and related documents\*

| Section/item                      | Item No | Description                                                                                                                                                                                                                                                                                                         |
|-----------------------------------|---------|---------------------------------------------------------------------------------------------------------------------------------------------------------------------------------------------------------------------------------------------------------------------------------------------------------------------|
| <b>Administrative information</b> |         |                                                                                                                                                                                                                                                                                                                     |
| Title                             | 1       | Descriptive title identifying the study design, population, interventions, and, if applicable, trial acronym <a href="#">page 1</a>                                                                                                                                                                                 |
| Trial registration                | 2a      | Trial identifier and registry name. If not yet registered, name of intended registry <a href="#">page 2</a>                                                                                                                                                                                                         |
|                                   | 2b      | All items from the World Health Organization Trial Registration Data Set <a href="#">NA</a>                                                                                                                                                                                                                         |
| Protocol version                  | 3       | Date and version identifier <a href="#">NA</a>                                                                                                                                                                                                                                                                      |
| Funding                           | 4       | Sources and types of financial, material, and other support <a href="#">page 15</a>                                                                                                                                                                                                                                 |
| Roles and responsibilities        | 5a      | Names, affiliations, and roles of protocol contributors <a href="#">page 1</a>                                                                                                                                                                                                                                      |
|                                   | 5b      | Name and contact information for the trial sponsor <a href="#">page 15-16</a>                                                                                                                                                                                                                                       |
|                                   | 5c      | Role of study sponsor and funders, if any, in study design; collection, management, analysis, and interpretation of data; writing of the report; and the decision to submit the report for publication, including whether they will have ultimate authority over any of these activities <a href="#">page 15-16</a> |
|                                   | 5d      | Composition, roles, and responsibilities of the coordinating centre, steering committee, endpoint adjudication committee, data management team, and other individuals or groups overseeing the trial, if applicable (see Item 21a for data monitoring committee) <a href="#">page 13</a>                            |
| <b>Introduction</b>               |         |                                                                                                                                                                                                                                                                                                                     |
| Background and rationale          | 6a      | Description of research question and justification for undertaking the trial, including summary of relevant studies (published and unpublished) examining benefits and harms for each intervention <a href="#">page 4-5</a>                                                                                         |
|                                   | 6b      | Explanation for choice of comparators <a href="#">page 4-5</a>                                                                                                                                                                                                                                                      |
| Objectives                        | 7       | Specific objectives or hypotheses <a href="#">page 5</a>                                                                                                                                                                                                                                                            |

1  
2 Trial design 8 Description of trial design including type of trial (eg, parallel group,  
3 crossover, factorial, single group), allocation ratio, and framework (eg,  
4 superiority, equivalence, noninferiority, exploratory) [page 6](#)  
5  
6  
7

## 8 **Methods: Participants, interventions, and outcomes**

9  
10 Study setting 9 Description of study settings (eg, community clinic, academic hospital)  
11 and list of countries where data will be collected. Reference to where  
12 list of study sites can be obtained [page 6](#)  
13

14 Eligibility criteria 10 Inclusion and exclusion criteria for participants. If applicable, eligibility  
15 criteria for study centres and individuals who will perform the  
16 interventions (eg, surgeons, psychotherapists) [page 6](#)  
17  
18

19 Interventions 11a Interventions for each group with sufficient detail to allow replication,  
20 including how and when they will be administered [page 7-8](#)  
21

22 11b Criteria for discontinuing or modifying allocated interventions for a  
23 given trial participant (eg, drug dose change in response to harms,  
24 participant request, or improving/worsening disease) [page 8](#)  
25

26 11c Strategies to improve adherence to intervention protocols, and any  
27 procedures for monitoring adherence (eg, drug tablet return,  
28 laboratory tests) [NA](#)  
29  
30

31 11d Relevant concomitant care and interventions that are permitted or  
32 prohibited during the trial [page 8](#)  
33

34 Outcomes 12 Primary, secondary, and other outcomes, including the specific  
35 measurement variable (eg, systolic blood pressure), analysis metric  
36 (eg, change from baseline, final value, time to event), method of  
37 aggregation (eg, median, proportion), and time point for each  
38 outcome. Explanation of the clinical relevance of chosen efficacy and  
39 harm outcomes is strongly recommended [page 9](#)  
40  
41

42 Participant 13 Time schedule of enrolment, interventions (including any run-ins and  
43 timeline washouts), assessments, and visits for participants. A schematic  
44 diagram is highly recommended (see Figure) [page 9](#)  
45

46 Sample size 14 Estimated number of participants needed to achieve study objectives  
47 and how it was determined, including clinical and statistical  
48 assumptions supporting any sample size calculations [page 10-11](#)  
49  
50

51 Recruitment 15 Strategies for achieving adequate participant enrolment to reach  
52 target sample size [page 10-11](#)  
53

## 54 **Methods: Assignment of interventions (for controlled trials)**

55 Allocation:  
56  
57  
58  
59  
60



|    |                |     |                                                                          |
|----|----------------|-----|--------------------------------------------------------------------------|
| 1  |                |     |                                                                          |
| 2  | Sequence       | 16a | Method of generating the allocation sequence (eg, computer-              |
| 3  | generation     |     | generated random numbers), and list of any factors for stratification.   |
| 4  |                |     | To reduce predictability of a random sequence, details of any planned    |
| 5  |                |     | restriction (eg, blocking) should be provided in a separate document     |
| 6  |                |     | that is unavailable to those who enrol participants or assign            |
| 7  |                |     | interventions <a href="#">page 7</a>                                     |
| 8  |                |     |                                                                          |
| 9  |                |     |                                                                          |
| 10 | Allocation     | 16b | Mechanism of implementing the allocation sequence (eg, central           |
| 11 | concealment    |     | telephone; sequentially numbered, opaque, sealed envelopes),             |
| 12 | mechanism      |     | describing any steps to conceal the sequence until interventions are     |
| 13 |                |     | assigned <a href="#">page 7</a>                                          |
| 14 |                |     |                                                                          |
| 15 | Implementation | 16c | Who will generate the allocation sequence, who will enrol participants,  |
| 16 |                |     | and who will assign participants to interventions <a href="#">page 7</a> |
| 17 |                |     |                                                                          |
| 18 |                |     |                                                                          |
| 19 | Blinding       | 17a | Who will be blinded after assignment to interventions (eg, trial         |
| 20 | (masking)      |     | participants, care providers, outcome assessors, data analysts), and     |
| 21 |                |     | how <a href="#">page 7</a>                                               |
| 22 |                |     |                                                                          |
| 23 |                | 17b | If blinded, circumstances under which unblinding is permissible, and     |
| 24 |                |     | procedure for revealing a participant's allocated intervention during    |
| 25 |                |     | the trial                                                                |
| 26 |                |     |                                                                          |
| 27 |                |     |                                                                          |

### Methods: Data collection, management, and analysis

|    |                 |     |                                                                                    |
|----|-----------------|-----|------------------------------------------------------------------------------------|
| 28 |                 |     |                                                                                    |
| 29 |                 |     |                                                                                    |
| 30 | Data collection | 18a | Plans for assessment and collection of outcome, baseline, and other                |
| 31 | methods         |     | trial data, including any related processes to promote data quality (eg,           |
| 32 |                 |     | duplicate measurements, training of assessors) and a description of                |
| 33 |                 |     | study instruments (eg, questionnaires, laboratory tests) along with                |
| 34 |                 |     | their reliability and validity, if known. Reference to where data                  |
| 35 |                 |     | collection forms can be found, if not in the protocol <a href="#">page 11-12</a>   |
| 36 |                 |     |                                                                                    |
| 37 |                 |     |                                                                                    |
| 38 |                 | 18b | Plans to promote participant retention and complete follow-up,                     |
| 39 |                 |     | including list of any outcome data to be collected for participants who            |
| 40 |                 |     | discontinue or deviate from intervention protocols <a href="#">page 11-12</a>      |
| 41 |                 |     |                                                                                    |
| 42 | Data            | 19  | Plans for data entry, coding, security, and storage, including any                 |
| 43 | management      |     | related processes to promote data quality (eg, double data entry;                  |
| 44 |                 |     | range checks for data values). Reference to where details of data                  |
| 45 |                 |     | management procedures can be found, if not in the protocol <a href="#">page 14</a> |
| 46 |                 |     |                                                                                    |
| 47 |                 |     |                                                                                    |
| 48 | Statistical     | 20a | Statistical methods for analysing primary and secondary outcomes.                  |
| 49 | methods         |     | Reference to where other details of the statistical analysis plan can be           |
| 50 |                 |     | found, if not in the protocol <a href="#">page 10</a>                              |
| 51 |                 |     |                                                                                    |
| 52 |                 | 20b | Methods for any additional analyses (eg, subgroup and adjusted                     |
| 53 |                 |     | analyses) <a href="#">page 10</a>                                                  |
| 54 |                 |     |                                                                                    |
| 55 |                 | 20c | Definition of analysis population relating to protocol non-adherence               |
| 56 |                 |     | (eg, as randomised analysis), and any statistical methods to handle                |
| 57 |                 |     | missing data (eg, multiple imputation) <a href="#">page 10</a>                     |
| 58 |                 |     |                                                                                    |
| 59 |                 |     |                                                                                    |
| 60 |                 |     |                                                                                    |

## Methods: Monitoring

- 1  
2  
3  
4 Data monitoring 21a Composition of data monitoring committee (DMC); summary of its role  
5 and reporting structure; statement of whether it is independent from  
6 the sponsor and competing interests; and reference to where further  
7 details about its charter can be found, if not in the protocol.  
8 Alternatively, an explanation of why a DMC is not needed [page 11 &](#)  
9 [13](#)  
10  
11  
12 21b Description of any interim analyses and stopping guidelines, including  
13 who will have access to these interim results and make the final  
14 decision to terminate the trial [page 13](#)  
15  
16 Harms 22 Plans for collecting, assessing, reporting, and managing solicited and  
17 spontaneously reported adverse events and other unintended effects  
18 of trial interventions or trial conduct [page 13](#)  
19  
20  
21 Auditing 23 Frequency and procedures for auditing trial conduct, if any, and  
22 whether the process will be independent from investigators and the  
23 sponsor [page 13](#)  
24

## Ethics and dissemination

- 25  
26  
27 Research ethics 24 Plans for seeking research ethics committee/institutional review board  
28 approval [already done page 14](#)  
29  
30 Protocol amendments 25 Plans for communicating important protocol modifications (eg,  
31 changes to eligibility criteria, outcomes, analyses) to relevant parties  
32 (eg, investigators, REC/IRBs, trial participants, trial registries, journals,  
33 regulators) [page 14](#)  
34  
35  
36 Consent or assent 26a Who will obtain informed consent or assent from potential trial  
37 participants or authorised surrogates, and how (see Item 32) [page 7](#)  
38  
39 26b Additional consent provisions for collection and use of participant data  
40 and biological specimens in ancillary studies, if applicable [NA](#)  
41  
42 Confidentiality 27 How personal information about potential and enrolled participants will  
43 be collected, shared, and maintained in order to protect confidentiality  
44 before, during, and after the trial [page 14](#)  
45  
46  
47 Declaration of interests 28 Financial and other competing interests for principal investigators for  
48 the overall trial and each study site [page 16](#)  
49  
50 Access to data 29 Statement of who will have access to the final trial dataset, and  
51 disclosure of contractual agreements that limit such access for  
52 investigators [page 14-15](#)  
53  
54 Ancillary and post-trial care 30 Provisions, if any, for ancillary and post-trial care, and for  
55 compensation to those who suffer harm from trial participation [NA](#)  
56  
57  
58  
59  
60

- 1  
2  
3  
4  
5  
6  
7  
8  
9  
10  
11  
12  
13  
14
- |                      |     |                                                                                                                                                                                                                                                                                                                |
|----------------------|-----|----------------------------------------------------------------------------------------------------------------------------------------------------------------------------------------------------------------------------------------------------------------------------------------------------------------|
| Dissemination policy | 31a | Plans for investigators and sponsor to communicate trial results to participants, healthcare professionals, the public, and other relevant groups (eg, via publication, reporting in results databases, or other data sharing arrangements), including any publication restrictions <a href="#">page 14-15</a> |
|                      | 31b | Authorship eligibility guidelines and any intended use of professional writers <a href="#">page 14-15</a>                                                                                                                                                                                                      |
|                      | 31c | Plans, if any, for granting public access to the full protocol, participant-level dataset, and statistical code                                                                                                                                                                                                |

## 15 Appendices

- 16  
17  
18  
19  
20  
21  
22  
23  
24
- |                            |    |                                                                                                                                                                                                |
|----------------------------|----|------------------------------------------------------------------------------------------------------------------------------------------------------------------------------------------------|
| Informed consent materials | 32 | Model consent form and other related documentation given to participants and authorised surrogates                                                                                             |
| Biological specimens       | 33 | Plans for collection, laboratory evaluation, and storage of biological specimens for genetic or molecular analysis in the current trial and for future use in ancillary studies, if applicable |

---

25 \*It is strongly recommended that this checklist be read in conjunction with the SPIRIT 2013  
26 Explanation & Elaboration for important clarification on the items. Amendments to the  
27 protocol should be tracked and dated. The SPIRIT checklist is copyrighted by the SPIRIT  
28 Group under the Creative Commons "[Attribution-NonCommercial-NoDerivs 3.0 Unported](#)"  
29 license.  
30  
31  
32  
33  
34  
35  
36  
37  
38  
39  
40  
41  
42  
43  
44  
45  
46  
47  
48  
49  
50  
51  
52  
53  
54  
55  
56  
57  
58  
59  
60
